1 **Title:** Resident Cardiac Macrophages Mediate Adaptive Myocardial Remodeling

2  
3 **Authors:** Nicole R. Wong<sup>1,\*</sup>, Jay Mohan<sup>1,\*</sup>, Benjamin J Kopecky<sup>1,\*</sup>, Shuchi Guo<sup>1,\*</sup>, Lixia  
4 Du<sup>2</sup>, Jamison Leid<sup>1</sup>, Oleksandr Dmytrenko<sup>1</sup>, Hannah Luehmann<sup>3</sup>, Geetika Bajpai<sup>1</sup>, Laura  
5 Ewald<sup>1</sup>, Lauren Bell<sup>1</sup>, Nikhil Patel<sup>4</sup>, Inessa Lokshina<sup>1</sup>, Andrea Bredemeyer<sup>1</sup>, Carla J.  
6 Weinheimer<sup>1</sup>, Jessica M. Nigro<sup>1</sup>, Attila Kovacs<sup>1</sup>, Sachio Morimoto<sup>5</sup>, Peter O. Bayguinov<sup>6</sup>,  
7 Max. R. Fisher<sup>6</sup>, James A.J. Fitzpatrick<sup>6,7</sup>, Slava Epelman<sup>8</sup>, Daniel Kreisel<sup>9,10</sup>, Rajan  
8 Sah<sup>1</sup>, Yongjian Liu<sup>3</sup>, Hongzhen Hu<sup>2</sup>, Kory J. Lavine<sup>1,9,11,#</sup>

9  
10 \*authors contributed equally to this work

11  
12  
13 **Affiliations:**

14 <sup>1</sup>Center for Cardiovascular Research, Departmental of Medicine, Cardiovascular Division,  
15 Washington University School of Medicine, St. Louis, MO, USA

16 <sup>2</sup>Department of Anesthesiology, Washington University School of Medicine, St. Louis, MO, USA

17 <sup>3</sup>Department of Radiology, Washington University School of Medicine, St. Louis, MO, USA

18 <sup>4</sup>Center for Genome Sciences and Systems Biology, Departmental of Genetics, Washington  
19 University School of Medicine, St. Louis, MO, USA

20 <sup>5</sup>Department of Physical Therapy, International University of Health and Welfare, Fukuoka, Japan

21 <sup>6</sup>Washington University Center for Cellular Imaging, Washington University School of Medicine,  
22 St. Louis, MO, USA

23 <sup>7</sup>Departments of Neuroscience and Cell Biology & Physiology, and Biomedical Engineering,  
24 Washington University School of Medicine, St. Louis, MO, USA

25 <sup>8</sup>Toronto General Hospital Research Institute, University Health Network (UHN), Toronto ON,  
26 M5G 1L7, Canada

27 <sup>9</sup>Department of Pathology and Immunology, Washington University School of Medicine, St. Louis,  
28 MO, USA

29 <sup>10</sup>Department of Surgery, Washington University School of Medicine, St. Louis, MO, USA

30 <sup>11</sup>Department of Developmental Biology, Washington University School of Medicine, St. Louis,  
31 MO, USA

32  
33  
34 **Key words:** Macrophages ▪ C-C chemokine receptor 2 (CCR2) ▪ heart failure ▪ dilated  
35 cardiomyopathy ▪ cardiac remodeling ▪ angiogenesis ▪ transient receptor potential  
36 vanilloid 4 (TRPV4)

37  
38  
39 **Running Title:** Cardiac Macrophages and Chronic Heart Failure

40  
41  
42 **# Address for correspondence**

43 Kory J. Lavine MD, PhD  
44 660 South Euclid Campus Box 8086  
45 St. Louis, MO, 63110  
46 Phone: 314 362-1171  
47 Fax: 314 362-0186  
48 Email: klavine@wustl.edu

49 **Summary:**

50 Cardiac macrophages represent a heterogeneous cell population with distinct origins,  
51 dynamics, and functions. Recent studies have revealed that C-C Chemokine Receptor 2  
52 positive (CCR2+) macrophages derived from infiltrating monocytes regulate myocardial  
53 inflammation and heart failure pathogenesis. Comparatively little is known about the  
54 functions of tissue resident (CCR2-) macrophages. Herein, we identify an essential role  
55 for CCR2- macrophages in the chronically failing heart. Depletion of CCR2-  
56 macrophages in mice with dilated cardiomyopathy accelerated mortality and impaired  
57 ventricular remodeling and coronary angiogenesis, adaptive changes necessary to  
58 maintain cardiac output in the setting of reduced cardiac contractility. Mechanistically,  
59 CCR2- macrophages interacted with neighboring cardiomyocytes via focal adhesion  
60 complexes and were activated in response to mechanical stretch through a transient  
61 receptor potential vanilloid 4 (TRPV4) dependent pathway that controlled growth factor  
62 expression. These findings establish a role for tissue resident macrophages in adaptive  
63 cardiac remodeling and introduce a new mechanism of cardiac macrophage activation.  
64

65 **Introduction:**

66 Paradigm shifting studies have demonstrated surprising heterogeneity among  
67 macrophage populations. It is now widely recognized that macrophages arise from  
68 distinct developmental origins including extraembryonic (yolk sac) and definitive  
69 hematopoietic progenitors and are maintained through differing mechanisms (Davies et  
70 al., 2013; Epelman et al., 2014b; Hashimoto et al., 2013; Hettinger et al., 2013; Hoeffel  
71 et al., 2015; Wynn et al., 2013; Yona et al., 2013). For example, microglia found within  
72 the brain are derived from extraembryonic hematopoiesis and maintained through local  
73 proliferation independent of monocyte input (Ginhoux et al., 2010), while macrophages  
74 that reside within the intestine are derived from definitive hematopoietic progenitors and  
75 are continually replenished by recruited monocytes (Bain et al., 2013). Most organs  
76 including the heart, lung, liver, and skin contain admixtures of distinct macrophage  
77 subsets with differing development origins, morphologies, tissue localizations, and  
78 population dynamics (Epelman et al., 2014a; Guilliams et al., 2013; Hoeffel et al., 2012;  
79 Theret et al., 2019). These findings have raised the possibility that individual  
80 macrophage subsets may execute unique and context specific functions.

81

82 Beyond regulating inflammatory signaling, macrophages contribute important functions  
83 to shaping and remodeling tissues throughout development and adulthood.

84 Macrophages are essential for the development and maturation of the nervous and  
85 vascular systems, contribute to bone and tooth morphogenesis, and clear remnants of  
86 cells that undergo programmed cell death within the embryo (Fantin et al., 2010; Munoz-  
87 Espin et al., 2013; Parkhurst et al., 2013; Storer et al., 2013; Theret et al., 2019). Many  
88 of these macrophage populations originate from embryonic progenitors, reside within  
89 tissues for prolonged periods of time, and are referred to as tissue resident  
90 macrophages. Tissue resident macrophages also orchestrate regeneration of cardiac

91 and appendage tissue following amputation or other forms of injury (Aurora et al., 2014;  
92 Godwin et al., 2017; Godwin et al., 2013; Lavine et al., 2014; Petrie et al., 2014). In the  
93 adult organism, tissue resident macrophages play key roles in maintaining organ  
94 homeostasis and physiology including iron metabolism and transport, regulation of  
95 hematopoiesis, clearance of airway debris and surfactant, facilitation of electrical  
96 impulses through cardiac conduction tissue (Chow et al., 2011; Hashimoto et al., 2013;  
97 Hulsmans et al., 2017; Soares and Hamza, 2016). However, little is understood  
98 regarding the functions of tissue resident macrophages in the context of chronic disease.  
99

100 Cardiac tissue remodeling is a widely recognized response to reductions in contractility,  
101 hemodynamic loading, or pathological insults to the heart. In these contexts, the heart  
102 undergoes robust geometric changes characterized by concentric thickening and dilation  
103 of the left ventricle (LV). While initially beneficial through reductions in LV wall stress,  
104 progressive myocardial hypertrophy and enlargement contributes to the development  
105 and progression of heart failure through cardiomyocyte cell death, further reduction in  
106 contractile function, and interstitial fibrosis. This process is referred to as  
107 adverse/pathological LV remodeling and is commonly observed across numerous  
108 cardiac pathologies such as myocardial infarction, viral myocarditis, and nonischemic  
109 cardiomyopathies (Burchfield et al., 2013; Xie et al., 2013).

110  
111 It is important to note that not all forms of cardiac remodeling are maladaptive. Adaptive  
112 changes such as LV chamber enlargement and eccentric hypertrophy represent  
113 physiological adaptations to exercise conditioning. This physiological form of  
114 hypertrophy is associated with coronary angiogenesis, cardiomyocyte lengthening, and  
115 is distinct from adverse remodeling at the transcriptional level. Interstitial fibrosis and  
116 contractile dysfunction are typically not present in physiological hypertrophy (Nakamura

117 and Sadoshima, 2018). At present, the precise cellular and molecular mechanisms that  
118 orchestrate adaptive cardiac remodeling are incompletely understood. Intriguingly,  
119 features of adverse and adaptive LV remodeling coexist in patients with chronic heart  
120 failure highlighting the clinical relevance of understanding each form of cardiac tissue  
121 remodeling (Cohn et al., 2000; Patel et al., 2017).

122

123 Given their functions during heart development, cardiac tissue resident macrophages  
124 represent an attractive cell type that may govern remodeling of myocardial tissue in  
125 response to hemodynamic perturbations and/or chronic disease. Under homeostatic  
126 conditions, the adult heart contains a heterogeneous population of tissue resident  
127 macrophages that can be divided into two functionally distinct subsets based on the cell  
128 surface expression of C-C chemokine receptor 2 (CCR2) (Epelman et al., 2014a).  
129 CCR2+ macrophages are derived from definitive hematopoietic progenitors, replenished  
130 by monocyte recruitment and subsequent proliferation, and function to initiate  
131 inflammatory cascades. In response to cardiomyocyte death, CCR2+ macrophages  
132 produce inflammatory cytokines, orchestrate the recruitment of neutrophils and  
133 monocytes, generate damaging oxidative productions, and consequently, contribute to  
134 the progression of heart failure through collateral myocardial injury and adverse cardiac  
135 remodeling (Bajpai et al., 2019; Lavine et al., 2014; Li et al., 2016; Patel et al., 2018).  
136 Clinically, CCR2+ macrophage abundance is predictive of and associated with adverse  
137 LV remodeling in advanced heart failure patients (Bajpai et al., 2018), and thus,  
138 represent a target for future immunomodulatory therapies. CCR2- macrophages are  
139 largely derived from embryonic (yolk sac and fetal liver) hematopoietic progenitors and  
140 are maintained independent of monocyte recruitment through local proliferation. CCR2-  
141 macrophages orchestrate the maturation of the developing coronary vasculature and  
142 neonatal heart regeneration (Lavine et al., 2014; Leid et al., 2016). In the adult heart,

143 CCR2- macrophages appear to suppress inflammatory responses following acute  
144 myocardial injury (Bajpai et al., 2019). Whether CCR2- macrophages have similar  
145 reparative functions in the context of chronic heart failure is unknown.  
146  
147 Herein, we test the hypothesis that tissue resident CCR2- macrophages are involved in  
148 adaptive remodeling of the chronically failing heart. By employing a mouse model of  
149 dilated cardiomyopathy harboring a causative human mutation, we define the  
150 composition and dynamics of macrophages residing within the chronically failing heart.  
151 Through selective cell depletion studies, we reveal an essential role for CCR2-  
152 macrophages in adaptive LV remodeling, coronary angiogenesis, maintenance of  
153 cardiac output, and survival of mice with dilated cardiomyopathy. Furthermore, we  
154 provide evidence that mechanical sensing through a transient receptor potential vanilloid  
155 4 (TRPV4) dependent pathway constitutes a novel mechanism controlling growth factor  
156 expression in tissue resident cardiac macrophages.

157 **Results:**

158 **Cardiac Macrophage Heterogeneity in Dilated Cardiomyopathy.** To investigate  
159 cardiac macrophage composition and function in chronic heart failure, we chose to focus  
160 on a mouse model of human dilated cardiomyopathy. Previously, knock-in mice were  
161 generated that harbor a causative mutation ( $\Delta K210$ ) in the endogenous Troponin T2  
162 (*Tnnt2*) locus (Du et al., 2007). The *Tnnt2* <sup>$\Delta K210$</sup>  mutation has been identified in numerous  
163 cohorts of familial and sporadic adult and pediatric dilated cardiomyopathy patients and  
164 is considered clinically as a pathogenic variant (McNally and Mestroni, 2017).  
165 Incorporation of the *Tnnt2* <sup>$\Delta K210$</sup>  mutant protein into sarcomeres leads to reduced thin  
166 filament calcium sensitivity and cardiomyocyte contractility (Clippinger et al., 2019;  
167 Morimoto et al., 2002).

168

169 Consistent with previous reports, homozygous mice (*Tnnt2* <sup>$\Delta K210/\Delta K210$</sup> ) develop a dilated  
170 cardiomyopathy with profound LV remodeling (dilation and hypertrophy), reduced LV  
171 function (ejection fraction), and early mortality (**Fig. 1A-B and Fig. S1A**). Serial  
172 echocardiography revealed that *Tnnt2* <sup>$\Delta K210/\Delta K210$</sup>  mice are born with reduced LV ejection  
173 fraction reflective of intrinsic impairment in cardiomyocyte contractility. LV remodeling  
174 (dilation and eccentric hypertrophy) was not evident until 2 weeks of age and increased  
175 progressively over time (**Fig. S1B**). These findings suggest that early LV remodeling  
176 may represent a compensatory response to reduced LV contractility.

177

178 To investigate the influence of chronic heart failure on cardiac macrophage abundance  
179 and composition, we examined histological sections obtained from control and  
180 *Tnnt2* <sup>$\Delta K210/\Delta K210$</sup>  hearts. CD68 immunostaining revealed increased macrophage  
181 abundance at both 1 week and 8 weeks of age (**Fig. 1C, E and Fig. S1C-D**). Flow

182 cytometry demonstrated significant shifts in cardiac macrophage composition over time.  
183 At 1 week of age,  $Tnnt2^{\Delta K210/\Delta K210}$  hearts displayed distributions of CCR2<sup>-</sup> macrophages,  
184 CCR2<sup>+</sup> macrophages, and monocytes that were indistinguishable from controls. At 8  
185 weeks of age,  $Tnnt2^{\Delta K210/\Delta K210}$  hearts contained increased abundance of CCR2<sup>+</sup>  
186 macrophages, CCR2<sup>-</sup> MHC-II<sup>low</sup> macrophages, CCR2<sup>-</sup> MHC-II<sup>high</sup> macrophages, and  
187 monocytes compared to controls. At 12 weeks of age, there was a progressive increase  
188 in the percentage of CCR2<sup>+</sup> macrophages and marked increase in monocyte  
189 abundance (**Fig. 1D, F, Fig. S1E, Fig. S2**).

190

191 To non-invasively assess cardiac macrophage composition in intact mice, we took  
192 advantage of a positron emission tomography (PET) based molecular imaging strategy  
193 that detects CCR2<sup>+</sup> macrophages (CCR2 PET) and total macrophages (CCR5 PET)  
194 previously established by our group (Heo et al., 2019; Luehmann et al., 2014). We  
195 observed robust CCR2 PET signal in the hearts of  $Tnnt2^{\Delta K210/\Delta K210}$  mice compared to  
196 controls. Inclusion of  $Tnnt2^{\Delta K210/\Delta K210} Ccr2^{-/-}$  mice provided evidence of radiotracer  
197 specificity and ruled out the possibility that increased CCR2 PET signal was a result of  
198 expanded blood pool size. Consistent with greater numbers of total cardiac  
199 macrophages in  $Tnnt2^{\Delta K210/\Delta K210}$  hearts, we observed increased CCR5 PET signal in the  
200 hearts of  $Tnnt2^{\Delta K210/\Delta K210}$  mice compared to controls (**Fig. 1G-H**).

201

202 Analysis of RNA sequencing data comparing control and  $Tnnt2^{\Delta K210/\Delta K210}$  hearts showed  
203 marked differences in gene expression that included pathways associated with collagen  
204 deposition, extracellular matrix organization, cell migration, and immune functions (**Fig.**  
205 **1I**). Numerous differentially expressed genes have been implicated in macrophage  
206 activation and function (CD44, Mrc2, Nr4a1, Tlr4, Lbp, Csf2ra, Jun, Fos, Irf6, Socs2,



207 Chil1, Ctgf, Gdf15, Ifngr1, Maff) (**Fig. S3**), suggesting a potential role for macrophages in  
208 the chronically failing heart.

209

210 **Origins and Dynamics of Cardiac Macrophages in Chronic Heart Failure.** To  
211 delineate the contribution of monocytes to each cardiac macrophage population in the  
212 chronically failing heart, we bred  $Tnnt2^{\Delta K210/\Delta K210}$  mice to  $CCR2^{gfp}$  knock-in mice to  
213 generate the following experimental groups:  $CCR2^{gfp/+}$  (control),  $CCR2^{gfp/gfp}$  (CCR2 KO),  
214  $Tnnt2^{\Delta K210/\Delta K210} CCR2^{gfp/+}$  (heart failure),  $Tnnt2^{\Delta K210/\Delta K210} CCR2^{gfp/gfp}$  (heart failure, CCR2  
215 KO).  $CCR2^{gfp}$  knock-in mice allow visualization of CCR2+ cells by immunostaining or  
216 flow cytometry in the absence of CCR2 protein expression or signaling (Satpathy et al.,  
217 2013). Immunostaining at 8 weeks of age demonstrated increased abundance of both  
218 CCR2- macrophages and CCR2+ macrophages in  $Tnnt2^{\Delta K210/\Delta K210}$  hearts compared to  
219 controls. Deletion of CCR2 did not impact the abundance of CCR2- macrophages in  
220 non-failing or  $Tnnt2^{\Delta K210/\Delta K210}$  hearts. Conversely, CCR2 deletion led to significant  
221 reductions in the abundance of CCR2+ macrophages in non-failing and  $Tnnt2^{\Delta K210/\Delta K210}$   
222 hearts (**Fig. S4A-B**). Flow cytometric analysis at 8 weeks of age confirmed selective  
223 reduction in CCR2+ macrophages in  $Tnnt2^{\Delta K210/\Delta K210} CCR2^{gfp/gfp}$  hearts compared to  
224  $Tnnt2^{\Delta K210/\Delta K210} CCR2^{gfp/+}$  hearts (**Fig. S4C**). These data indicate that during this stage of  
225 chronic heart failure, CCR2- macrophages are maintained in the absence of monocyte  
226 input, whereas, CCR2+ macrophages require ongoing monocyte recruitment. Cell  
227 proliferation as assessed by Ki67 staining was exclusively increased in CCR2-  
228 macrophages in  $Tnnt2^{\Delta K210/\Delta K210}$  hearts compared to controls (**Fig. S4D-E**).

229

230 To delineate the developmental origin of cardiac macrophages in the chronically failing  
231 heart, we crossed  $Tnnt2^{\Delta K210/\Delta K210}$  mice to Flt3-Cre Rosa26-tdTomato mice. Flt3-Cre is

232 selectively active in definitive hematopoietic stem cells, and thus labels monocytes and  
233 macrophages derived from definitive hematopoiesis (Boyer et al., 2011). This strategy  
234 has extensively been used to distinguish macrophages derived from extraembryonic  
235 hematopoiesis from macrophages derived from definitive hematopoiesis (Epelman et al.,  
236 2014a; Lavine et al., 2014; Leid et al., 2016). Consistent with previous reports, >90% of  
237 CCR2<sup>+</sup> macrophages in control hearts were tdTomato<sup>+</sup> at both 1 and 12 weeks of age.  
238 Conversely, <40% of CCR2<sup>-</sup> macrophages in control hearts were tdTomato<sup>+</sup> highlighting  
239 the significant contribution of extraembryonic hematopoiesis to this macrophage subset.  
240 The frequency of tdTomato<sup>+</sup> positivity did not significantly differ between control and  
241 *Tnnt2*<sup>ΔK210/ΔK210</sup> hearts (**Fig. S4F-G**). Collectively, these findings indicate that in the  
242 context of chronic heart failure, CCR2<sup>-</sup> macrophages represent a mixed population of  
243 cells with contributions from extraembryonic and definitive hematopoiesis and are  
244 maintained by local proliferation in the absence of monocyte input. CCR2<sup>+</sup> macrophages  
245 are exclusively derived from definitive hematopoiesis, long-lived, and maintained through  
246 gradual monocyte input.

247

#### 248 **Tissue Resident CCR2<sup>-</sup> and CCR2<sup>+</sup> Macrophages Represent Functionally Distinct**

249 **Populations in the Chronically Failing Heart.** To gain insights into functional  
250 differences between macrophage populations that reside within the chronically failing  
251 heart, we performed gene expression profiling using a high sensitivity microarray  
252 platform. RNA was harvested from the following cell populations isolated from  
253 *Tnnt2*<sup>ΔK210/ΔK210</sup> Flt3-Cre Rosa26-tdTomato hearts using flow cytometry based cell  
254 sorting: CCR2<sup>+</sup> macrophages (CCR2<sup>+</sup>MHC-II<sup>high</sup>tdTomato<sup>+</sup>), CCR2<sup>-</sup>MHC-II<sup>low</sup>tdTomato<sup>-</sup>  
255 macrophages, CCR2<sup>-</sup>MHC-II<sup>high</sup>tdTomato<sup>-</sup> macrophages, CCR2<sup>-</sup>MHC-II<sup>low</sup>tdTomato<sup>+</sup>  
256 macrophages, CCR2<sup>-</sup>MHC-II<sup>high</sup>tdTomato<sup>+</sup> macrophages, and Ly6C<sup>high</sup> monocytes

257 (Ly6C<sup>high</sup>MHC-II<sup>low</sup>CCR2+). Hierarchical clustering and principal component analysis  
258 revealed that the largest differences existed between CCR2- macrophages, CCR2+  
259 macrophages, and Ly6C<sup>high</sup> monocytes. CCR2+ macrophages clustered close to  
260 monocytes, which is consistent with ontological relationship between cell types.  
261 Importantly, each subset of CCR2- macrophages clustered together suggesting a high  
262 degree of similarity in gene expression amongst those populations (**Fig. 2A-B**).  
263  
264 Differential gene expression analysis demonstrated that 893 genes were differentially  
265 expressed between CCR2- macrophages and CCR2+ macrophages and 429 genes  
266 were differentially expressed between monocytes and macrophages using a threshold  
267 value of 1.5-fold and FDR adjusted p-value<0.05, highlighting the marked divergence  
268 between CCR2- macrophages and CCR2+ macrophages. Few differences were  
269 observed between individual CCR2- macrophage populations. Comparisons between  
270 CCR2- macrophages derived from definitive and extra-embryonic hematopoiesis  
271 revealed a single differentially expressed gene. Only 13 genes were differentially  
272 expressed between CCR2- MHC-II<sup>high</sup> and CCR2- MHC-II<sup>low</sup> populations, many of which  
273 were MHC-II alleles (**Fig. 2C**). Pathway analysis of genes differentially expressed  
274 between CCR2- macrophages and CCR2+ macrophages demonstrated that CCR2+  
275 macrophages expressed genes associated with antigen presentation,  
276 immune/inflammatory response, T-cell co-stimulation, integrin signaling, and  
277 angiogenesis (**Fig. 2D-E**). Examples of genes upregulated in CCR2+ macrophages  
278 included Il1 $\beta$ , Gdf3, Lgals3, Ccl17, Cxcl19, Itgax, Itgb7, Itgax, Traf1, Tnip3, Tnfsf14,  
279 Timp1, Mmp12, Mmp19, Vegfa, Pgf, Col4a1, Col3a1, and Fn1. In contrast, CCR2-  
280 macrophages showed enrichment of pathways associated with endocytosis/transport,  
281 nervous system development, cell adhesion, and migration in CCR2- macrophages.  
282 CCR2- macrophages expressed a paucity of inflammatory mediators and instead

283 differentially expressed growth factors and genes associated with sensing mechanical  
284 stimuli including Igf1, Hbegf, Bmp2, Cyr61, Pdgfc, Fgf9, Trpv4, CD33, and Rhob (**Fig.**  
285 **2F**).

286

287 **CCR2- Macrophages are Required for Survival, Adaptive Tissue Remodeling, and**  
288 **Maintenance of Cardiac Output in the Chronically Failing Heart.** We chose to focus  
289 on delineating the functions of CCR2- macrophages in the chronically failing heart, given  
290 their absolute abundance and unique gene expression signatures. We utilized CD169-  
291 DTR mice to selectively deplete CCR2- macrophages from the heart. We generated the  
292 following experimental groups: control, CD169-DTR,  $Tnnt2^{\Delta K210/\Delta K210}$ , and  $Tnnt2^{\Delta K210/\Delta K210}$   
293 CD169-DTR mice. Consistent with our previous findings (Bajpai et al., 2019), daily  
294 intraperitoneal administration of diphtheria toxin (DT) to CD169-DTR and  $Tnnt2^{\Delta K210/\Delta K210}$   
295 CD169-DTR mice led to marked reduction in cardiac macrophage density and selective  
296 elimination of CCR2- macrophages (**Fig. 3A-D**). Neutrophil, monocyte, and CCR2+  
297 macrophage abundance was not impacted by CCR2- macrophages depletion. CCR2-  
298 macrophage depletion did not increase CCR2+ macrophage chemokine or cytokine  
299 expression or result in alteration in serum chemistries or cytokines (**Fig. S5-6**).

300

301 To assess whether CCR2- macrophages influence survival, cardiac function, and LV  
302 remodeling in the context of chronic heart failure, we treated control, CD169-DTR,  
303  $Tnnt2^{\Delta K210/\Delta K210}$ , and  $Tnnt2^{\Delta K210/\Delta K210}$  CD169-DTR mice with DT beginning at 6 weeks of  
304 age. The primary endpoints included a Kaplan-Meier survival analysis and  
305 echocardiographic assessment of LV function and remodeling performed at 9 weeks of  
306 age (3-weeks of DT treatment). Kaplan-Meier analysis revealed reduced survival of  
307  $Tnnt2^{\Delta K210/\Delta K210}$  CD169-DTR mice compared  $Tnnt2^{\Delta K210/\Delta K210}$  mice. No mortality was

308 observed in control or CD169-DTR mice over the treatment period (**Fig. 3E**).

309 Echocardiography demonstrated that similar reductions in LV ejection fraction between

310  $Tnnt2^{\Delta K210/\Delta K210}$  mice and  $Tnnt2^{\Delta K210/\Delta K210}$  CD169-DTR mice compared to controls (**Fig.**

311 **3F**).  $Tnnt2^{\Delta K210/\Delta K210}$  mice displayed significantly greater LV remodeling (LV dilation and

312 reduced relative LV wall thickness) compared to  $Tnnt2^{\Delta K210/\Delta K210}$  CD169-DTR mice (**Fig.**

313 **3G-H**).  $Tnnt2^{\Delta K210/\Delta K210}$  mice displayed increased LV stroke volumes compared to

314 controls, whereas  $Tnnt2^{\Delta K210/\Delta K210}$  CD169-DTR mice had lower LV stroke volumes

315 compared to both control and  $Tnnt2^{\Delta K210/\Delta K210}$  mice. (**Fig. 3I**). No differences were

316 observed between control and CD169-DTR mice for all echocardiographic variables

317 examined. Simultaneous measurement of LV pressure and volume confirmed reductions

318 in LV end diastolic volume and stroke volume (measures of dilation) in  $Tnnt2^{\Delta K210/\Delta K210}$

319 CD169-DTR compared to  $Tnnt2^{\Delta K210/\Delta K210}$  mice (**Fig. 3J**). LV catheterization and

320 dobutamine infusion revealed reduced LV end systolic pressure, myocardial contractility,

321 and contractile reserve in  $Tnnt2^{\Delta K210/\Delta K210}$  mice compared to controls. CCR2-

322 macrophage depletion did not impact measurements of myocardial contractility in either

323 wild type or  $Tnnt2^{\Delta K210/\Delta K210}$  backgrounds (**Fig. 3K, Fig. S7**). Collectively, these findings

324 indicate that CCR2- macrophage depletion blunts LV chamber remodeling in

325  $Tnnt2^{\Delta K210/\Delta K210}$  mice without impacting myocardial contractility.

326

327 **CCR2- Macrophages are Required for Myocardial Tissue Remodeling and**

328 **Coronary Angiogenesis.** We performed histological analysis following 3 weeks of DT

329 treatment to examine whether structural differences within the myocardium explain

330 reductions in LV dilation and remodeling in  $Tnnt2^{\Delta K210/\Delta K210}$  CD169-DTR hearts.

331 Compared to controls,  $Tnnt2^{\Delta K210/\Delta K210}$  hearts displayed evidence of myocardial

332 reorganization consisting of circumferential enlargement of the LV, loss of trabecular

333 myocardial tissue, and expansion of compact myocardial tissue.  $Tnnt2^{\Delta K210/\Delta K210}$  CD169-  
334 DTR hearts displayed reduced circumferential LV enlargement, persistent trabecular  
335 myocardial tissue, and failed to expand the compact myocardium. CD169-DTR mice  
336 displayed no significant changes compared to controls (**Fig. 4A-C**). To verify these  
337 structural alterations by a second method, we performed X-Ray microscopy (XRM), a  
338 variant of micro-computed tomography ( $\mu$ CT). This technique provides full volume  
339 datasets enabling three-dimensional reconstruction of cardiac anatomy and virtual  
340 histology analysis. Surface projection and virtual histology images of the LV chamber  
341 revealed the presence of smooth appearing walls and precise alignment of muscle fibers  
342 in  $Tnnt2^{\Delta K210/\Delta K210}$  hearts. In contrast, the LV walls of  $Tnnt2^{\Delta K210/\Delta K210}$  CD169-DTR hearts  
343 displayed a more ribbon-like appearance and impaired muscle fiber alignment (**Fig. 4D**).  
344 Collectively, these findings indicate that CCR2- macrophages influence LV remodeling  
345 through alterations in myocardial tissue organization.

346

347 To examine whether CCR2- macrophages also affect cardiomyocyte size, we performed  
348 a morphometric analysis of cardiomyocytes isolated from control,  $Tnnt2^{\Delta K210/\Delta K210}$ , and  
349  $Tnnt2^{\Delta K210/\Delta K210}$  CD169-DTR hearts.  $Tnnt2^{\Delta K210/\Delta K210}$  and  $Tnnt2^{\Delta K210/\Delta K210}$  CD169-DTR  
350 cardiomyocytes demonstrated increased 2-dimensional area compared to  
351 cardiomyocytes isolated from control hearts. However, the extent of cell enlargement  
352 was greater in  $Tnnt2^{\Delta K210/\Delta K210}$  cardiomyocytes compared to  $Tnnt2^{\Delta K210/\Delta K210}$  CD169-DTR  
353 cardiomyocytes.  $Tnnt2^{\Delta K210/\Delta K210}$  cardiomyocytes displayed increases in both cell width  
354 and length compared to control hearts. Interesting,  $Tnnt2^{\Delta K210/\Delta K210}$  CD169-DTR  
355 cardiomyocytes displayed similar increases in cell width, but less extensive cell  
356 lengthening (**Fig. 4E-F**). These data suggest that modulation of cardiomyocyte length  
357 might also be involved in CCR2- macrophage dependent LV remodeling.

358

359 To evaluate whether CCR2- macrophages influence adverse/pathological LV  
360 remodeling, we examined cardiomyocyte cross-sectional area, interstitial fibrosis, and  
361 mRNA expression of established marker genes. Examination of cardiomyocyte cross-  
362 sectional area *in situ* using wheat germ agglutinin stained sections demonstrated  
363 increased cardiomyocyte area in both  $Tnnt2^{\Delta K210/\Delta K210}$  and  $Tnnt2^{\Delta K210/\Delta K210}$  CD169-DTR  
364 hearts compared to controls. Of note, minimal evidence of interstitial fibrosis was evident  
365 in this model at the stages examined (**Fig. S8A-D**). *Nppa*, *Nppb*, and *Myh7* mRNA  
366 expression was increased to a similar degree in  $Tnnt2^{\Delta K210/\Delta K210}$  and  $Tnnt2^{\Delta K210/\Delta K210}$   
367 CD169-DTR hearts compared to controls (**Fig. S8E-G**). Previous studies have  
368 implicated matrix metalloproteinase (MMP) activity in LV dilation and remodeling in the  
369 context of myocardial infarction and injury models (Ducharme et al., 2000; Heymans et  
370 al., 1999). We observed negligible MMP9 activity in the hearts of control and  
371  $Tnnt2^{\Delta K210/\Delta K210}$  mice. Robust MMP9 activity was present in a mouse model of DT-  
372 mediated cardiomyocyte ablation that mimics myocardial infarction (**Fig. S8H**).

373

374 Given previous findings that CCR2- macrophages regulate coronary angiogenesis in the  
375 embryonic and neonatal heart (Lavine et al., 2014; Lavine et al., 2013; Leid et al., 2016),  
376 we evaluated whether CCR2- macrophages also modulate coronary angiogenesis in the  
377 context of chronic heart failure. Visualization of the coronary arterial vasculature using  
378 Microfil casting demonstrated marked increases in epicardial coronary arterial  
379 vasculature in  $Tnnt2^{\Delta K210/\Delta K210}$  hearts compared to controls. Strikingly, we observed  
380 expansion of the epicardial coronary arterial vasculature was markedly attenuated in  
381  $Tnnt2^{\Delta K210/\Delta K210}$  CD169-DTR hearts (**Fig. 5A**). Measurement of coronary microvascular  
382 density similarly revealed robust increases in  $Tnnt2^{\Delta K210/\Delta K210}$  hearts compared to

383 controls and  $Tnnt2^{\Delta K210/\Delta K210}$  CD169-DTR hearts (**Fig. 5B-C**). To explore potential  
384 mechanisms by which CCR2- macrophages promote coronary angiogenesis, we  
385 measured the expression pro-angiogenic growth factors expressed in CCR2-  
386 macrophages. Consistent with such a mechanism, *Igf1*, *Pdgfc*, *Cyr61*, and *Hbegf* mRNA  
387 expression was increased in CCR2- macrophages from  $Tnnt2^{\Delta K210/\Delta K210}$  hearts compared  
388 to controls (**Fig. 5D**). Immunostaining analysis further revealed that macrophage IGF1  
389 and CYR61 expression was increased in  $Tnnt2^{\Delta K210/\Delta K210}$  hearts compared to controls.  
390 Increased macrophage IGF1 and CYR61 expression was not evident in  $Tnnt2^{\Delta K210/\Delta K210}$   
391 CD169-DTR hearts, presumably due to the absence of CCR2- macrophages (**Fig. 5E-**  
392 **F**). These observations indicate that CCR2- macrophages promote coronary  
393 angiogenesis in the context of chronic heart failure.

394  
395 Previous work has suggested that cardiac macrophages have the potential to influence  
396 propagation of electrical signals through the atrioventricular node (Hulsmans et al.,  
397 2017). To assess whether alterations in electrical conduction occurred following  
398 depletion of CCR2- macrophages from control and  $Tnnt2^{\Delta K210/\Delta K210}$  mice, we analyzed  
399 surface electrocardiograms (ECGs) obtained from anesthetized (isoflurane) control,  
400 CD169-DTR,  $Tnnt2^{\Delta K210/\Delta K210}$ , and  $Tnnt2^{\Delta K210/\Delta K210}$  CD169-DTR mice treated with DT for 3  
401 weeks. We did not observe significant differences in RR (heart rate), PR (atrioventricular  
402 node conduction), or QRS (intraventricular conduction) intervals between experimental  
403 groups.  $Tnnt2^{\Delta K210/\Delta K210}$  and  $Tnnt2^{\Delta K210/\Delta K210}$  CD169-DTR mice displayed prolongation of  
404 the QT (ventricular repolarization) interval compared to control and CD169-DTR mice.  
405 No significant differences were observed between  $Tnnt2^{\Delta K210/\Delta K210}$  and  $Tnnt2^{\Delta K210/\Delta K210}$   
406 CD169-DTR mice for any examined parameter (**Fig. S9**). While these results indicate  
407 that defects in electrical propagation are unlikely to account for increased mortality



408 observed in  $Tnnt2^{\Delta K210/\Delta K210}$  CD169-DTR mice, they do not rule out the possibility that  
409 CCR2- macrophages contribute to optimal cardiac conduction. Intriguingly, we found that  
410 both CCR2- and CCR2+ macrophages are located within the AV node potentially  
411 accounting for the lack of an overt electrical phenotype (**Fig. S10**).

412

413 A recent study suggested that tissue resident cardiac macrophages regulate myocardial  
414 metabolism and function through effects on mitochondrial homeostasis (Nicolas-Avila et  
415 al., 2020). To examine whether this might contribute to the phenotype of  $Tnnt2^{\Delta K210/\Delta K210}$   
416 CD169-DTR mice, we isolated mitochondria from control, CD169-DTR,  $Tnnt2^{\Delta K210/\Delta K210}$ ,  
417 and  $Tnnt2^{\Delta K210/\Delta K210}$  CD169-DTR hearts following 3 weeks of DT treatment. We did not  
418 detect any differences in mitochondrial respiration across experimental groups (**Fig.**  
419 **S11**), indicating that alterations in mitochondrial function are unlikely responsible for the  
420 cardiac phenotype of  $Tnnt2^{\Delta K210/\Delta K210}$  CD169-DTR mice.

421

422 **CCR2- Macrophages Physically Interact with Neighboring Cardiomyocytes.** To gain  
423 insights into how resident cardiac macrophages might influence myocardial remodeling  
424 and angiogenesis, we examined CCR2- and CCR2+ macrophage localization and  
425 structure in control and  $Tnnt2^{\Delta K210/\Delta K210}$  hearts using three-dimensional confocal  
426 microscopy. Under baseline and heart failure conditions, CCR2- macrophages were  
427 observed within close proximity to cardiomyocytes and appeared to extend processes  
428 that contacted adjacent cardiomyocytes. CCR2+ macrophages were also found within  
429 the myocardium and extended processes within the interstitial space (**Fig. 6A-B**).

430 Electron microscopy of  $Tnnt2^{\Delta K210/\Delta K210}$   $CCR2^{gfp/+}$  hearts stained with anti-CD68 and anti-  
431 GFP antibodies confirmed that CCR2- macrophages were in close apposition to  
432 neighboring cardiomyocytes and revealed the presence of physical contacts between

433 these two cell types (**Fig. 6C**). CCR2<sup>+</sup> macrophages were also found within the  
434 myocardium and extended processes into the interstitial space but did not directly  
435 contact cardiomyocytes (**Fig. 6D**). The projection length of CCR2<sup>-</sup> macrophages was  
436 greater in  $Tnnt2^{\Delta K210/\Delta K210}$  hearts compared to controls. The projection length of CCR2<sup>+</sup>  
437 macrophages was indistinguishable between control and  $Tnnt2^{\Delta K210/\Delta K210}$  CCR2<sup>gfp/+</sup> hearts  
438 (**Fig. 6E**).

439

440 To characterize the temporal dynamics of how CCR2<sup>-</sup> macrophages interact with  
441 adjacent cardiomyocytes *in situ*, we performed two-photon microscopy on isolated  
442 mouse papillary muscle preparations. Papillary muscles were isolated from  $Cx3cr1^{GFP/+}$   
443  $Ccr2^{RFP/+}$  mice and imaged for 1-2 hours in a temperature-controlled imaging chamber  
444 containing oxygenated media. Cellular processes were observed that extended from  
445 CCR2<sup>-</sup> macrophages and formed stable contacts with neighboring cardiomyocytes.  
446 These processes did not further extend or retract over the 90-minute time course of  
447 imaging (**Fig. 6F, supplemental movie**). Predominately CCR2<sup>-</sup> macrophages interacted  
448 with cardiomyocytes (**Fig. 6G**).

449

450 We did not observe electron densities indicative of desmosomes, adherens junctions, or  
451 tight junctions between CCR2<sup>-</sup> macrophages and cardiomyocytes. Immunostaining for  
452  $\alpha$ -cadherin (adherens junctions), desmoplakin (desmosomes), claudin (tight  
453 junctions), and Cx43 (gap junctions) revealed infrequent co-localization of these  
454 markers at sites of macrophage-cardiomyocyte interactions. Instead, we found that FAK  
455 and Paxillin (markers of focal adhesion complexes) were frequently present between  
456 CCR2<sup>-</sup> macrophages and cardiomyocytes (**Fig. 6H-I, Fig. S12**).

457

458 We then utilized an *in vitro* system to delineate whether focal adhesion complexes were  
459 responsible for macrophage-cardiomyocyte interactions. We found that HL-1  
460 cardiomyocytes and bone marrow-derived macrophages formed spontaneous  
461 interactions when co-cultured. Electron microscopy revealed evidence of physical  
462 interaction between HL1-cells and cardiomyocytes. Electron densities consistent with  
463 desmosomes, adherens, tight, or gap junctions were not evident. Immunostaining  
464 showed presence of Paxillin staining at sites of interactions between HL-1 cells and  
465 bone marrow-derived macrophages (**Fig. S13**).

466

467 As previous studies have established that  $\beta$ -integrins are essential for formation of focal  
468 adhesion complexes (Parsons et al., 2010), we focused our attention on inhibiting  $\beta$ -  
469 integrin binding. Addition of RDG peptides or antibodies that blocked either  $\beta$ 1-integrin or  
470  $\beta$ 2-integrin binding was sufficient to disrupt interactions between HL-1 cells and bone  
471 marrow-derived macrophages. Application of  $\beta$ 1-integrin neutralizing antibodies also  
472 resulted in loss of macrophage Paxillin staining at sites of cardiomyocyte-macrophage  
473 interaction (**Fig. S14**). Collectively, these findings indicate that CCR2- macrophages  
474 physically interact with cardiomyocytes and form focal adhesion complexes at sites of  
475 cell-cell contacts.

476

477 **TRPV4 Regulates Growth Factor Expression in Macrophages.** Based on their  
478 morphology and physical interaction with neighboring cardiomyocytes, we considered  
479 the possibility that CCR2- macrophages may be activated by mechanical cues in the  
480 context of heart failure. Specifically, we proposed that elevated LV chamber pressure  
481 and resultant increased LV myocardial wall stress may be sensed by CCR2-  
482 macrophages through their interactions with neighboring cardiomyocytes. To explore this

483 concept, we assayed the expression of known mechanoresponsive factors and found  
484 that TRPV4 mRNA was abundantly expressed in CCR2- macrophages (**Fig. 7A, Fig.**  
485 **S15**). Ratiometric calcium assays demonstrated that the TRPV4 channel was active in  
486 cardiac macrophages. Treatment of CCR2- and CCR2+ macrophages isolated from the  
487 heart by flow cytometry with a highly specific TRPV channel activator (GSK101) or  
488 TRPV4 channel inhibitor (GSK219) confirmed functional expression of TRPV4 protein in  
489 both CCR2- and CCR2+ macrophages within the ventricular myocardium (**Fig. 7B, Fig.**  
490 **S15**). Immunostaining of TRPV4-GFP BAC transgenic mice provided further evidence  
491 the TRPV4 was predominately expressed in macrophages located within the LV  
492 myocardium (**Fig. 7C**). Flow cytometry demonstrated expression of TRPV4 in cardiac  
493 macrophages and neutrophils (**Fig. 7D, Fig. S16**). We additionally detected TRPV4  
494 activity in cardiac macrophages *in situ* using CX3CR1-ertCre Rosa26-  
495 GCaMP6s/tdtomato reporter mice (Madisen et al., 2015), which allows visualization of  
496 macrophage cytoplasmic calcium by restricting GCaMP6s expression to macrophages.  
497 2-photon imaging of papillary muscles isolated from CX3CR1-ertCre Rosa26-  
498 GCaMP6/tdTomato hearts placed under axial tension revealed GCaMP signal in cardiac  
499 macrophages. Application of a TRPV4 inhibitor (GSK219) suppressed GCaMP signal,  
500 indicating that TRPV4 channel activity is responsible for the observed rise in  
501 macrophage cytoplasmic calcium (**Fig. 7E-F, Fig. S17**).

502

503 To examine the possibility that TRPV4 mediates the activation of macrophages by  
504 mechanical cues, we first utilized bone marrow-derived macrophages. Ratiometric  
505 calcium assays confirmed that bone marrow-derived macrophages express functional  
506 TRPV4 channels (**Fig. 7G**). Immunostaining of bone marrow-derived macrophages co-  
507 cultured with HL1 cardiomyocytes revealed expression of TRPV4 expression at sites of  
508 macrophage and cardiomyocyte interaction (**Fig. S18**). We then subjected bone marrow-

509 derived macrophages to cyclic mechanical stretch. Cells were cultured on silicone  
510 membranes coated with collagen and fibronectin. Membranes were then stretched (10%  
511 deformation, 1 Hz) for 24 hours in the presence of vehicle control or GSK219 (TRPV  
512 inhibitor). Following 24 hours of cyclic uniaxial stretch, both vehicle and TRPV4 inhibitor  
513 treated macrophages elongated and aligned along the axis of membrane deformation  
514 (**Fig. 7H**). Quantitative RT-PCR assays revealed that bone marrow-derived  
515 macrophages expressed increased levels of Igf1, Hbegf, and Cyr61 mRNA in response  
516 to mechanical stretch. Application of the TRPV4 channel inhibitor blocked this response  
517 (**Fig. 7I**).

518  
519 To determine whether canonical pathways involved in macrophage activation affected  
520 the ability of mechanical stretch to induce macrophage growth factor expression, we  
521 subjected control, Myd88<sup>-/-</sup> and Trif<sup>-/-</sup> bone marrow derived-macrophages to uniaxial  
522 cyclic stretch. Quantitative RT-PCR assays demonstrated that deletion of MYD88 or  
523 TRIF had no impact on the expression of Igf1, Hbegf, or Cyr61 (**Fig. 7J**). Further,  
524 activators of MYD88 and TRIF signaling (LPS, PolyIC) were unable to increase the  
525 expression of Igf1, Hbegf, or Cyr61 and mechanical stretch did not induce the  
526 expression of inflammatory cytokines (**Fig. S19**). Collectively, these observations  
527 indicate that mechanical stretch promotes growth factor expression from macrophages  
528 through a TRPV4 dependent mechanism that is independent of MYD88 and TRIF  
529 signaling.

530

531 **TRPV4 regulates IGF1 expression in CCR2- macrophages and is required for**  
532 **coronary angiogenesis.** To assess the functional relevance of TRPV4 *in vivo*, we  
533 treated control and Tnnt2<sup>ΔK210/ΔK210</sup> mice with either vehicle control, TRPV4 inhibitor, or  
534 TRPV4 agonist beginning at 6 weeks of age. Immunostaining for CD68 and IGF1 after 2

535 days of treatment revealed that TRPV4 activity modulates cardiac macrophage IGF1  
536 expression. Compared to controls, cardiac macrophages in  $Tnnt2^{\Delta K210/\Delta K210}$  hearts  
537 expressed IGF1 at higher frequency and increased mean levels. Treatment of  
538  $Tnnt2^{\Delta K210/\Delta K210}$  mice with the TRPV4 inhibitor was sufficient to reduce IGF1 expression  
539 (frequency and mean levels) in cardiac macrophages. Conversely, mice treated with the  
540 TRPV4 agonist displayed increased IGF1 expression in cardiac macrophages (**Fig. 8A-**  
541 **B, Fig. S20**). These data indicate that TRPV4 regulates cardiac macrophage IGF1  
542 expression *in vivo*.

543  
544 To determine whether suppression of TRPV4 activity impairs reparative responses that  
545 are dependent on CCR2- macrophages, we treated control and  $Tnnt2^{\Delta K210/\Delta K210}$  mice with  
546 a TRPV4 inhibitor daily for 2 weeks beginning at 6 weeks of age. Histological evaluation  
547 demonstrated persistence of trabecular myocardium in  $Tnnt2^{\Delta K210/\Delta K210}$  hearts treated  
548 with the TRPV4 inhibitor, a phenotype that is reminiscent of depleting CCR2-  
549 macrophages (**Fig. 8C-D**). While TRPV4 inhibition had no impact on ejection fraction, we  
550 observed attenuated LV dilation in  $Tnnt2^{\Delta K210/\Delta K210}$  mice treated with the TRPV4 inhibitor  
551 (**Fig. 8E**). Examination of the coronary vasculature revealed that vehicle treated  
552  $Tnnt2^{\Delta K210/\Delta K210}$  mice displayed evidence of coronary angiogenesis at the microvascular  
553 and macrovascular levels compared to vehicle treated control mice. Importantly,  
554  $Tnnt2^{\Delta K210/\Delta K210}$  mice treated with the TRPV4 inhibitor displayed marked reductions in  
555 CD34+ blood vessel density within the LV myocardium and reduced large coronary  
556 artery complexity and branching compared to vehicle treated  $Tnnt2^{\Delta K210/\Delta K210}$  hearts. In  
557 contrast, treatment with the TRPV4 inhibitor had no impact on coronary microvascular  
558 density in control mice (**Fig. 8F-I**). Together, these observations demonstrate that  
559 TRPV4 channel activity is necessary for adaptive LV remodeling and coronary

560 angiogenesis in the context of dilated cardiomyopathy and suggest a novel mechanism  
561 by which tissue resident cardiac macrophages contribute to the survival of the failing  
562 heart.

563

564 **Discussion:**

565 Inflammation has long been associated with heart failure development, progression, and  
566 prognosis. Strong clinical associations and mechanistic studies in model organisms have  
567 established that monocytes and macrophages contribute to adverse LV remodeling and  
568 heart failure pathogenesis. Unfortunately, clinical studies exploring the use of  
569 corticosteroids and tumor necrosis factor (TNF) antagonists in heart failure and  
570 myocardial infarction failed to show clinical efficacy dampening enthusiasm for the  
571 development of immunomodulatory therapies (Chung et al., 2003; Mann, 2015; Murphy  
572 et al., 2020; Parrillo et al., 1989). In fact, each of these treatment strategies was  
573 associated with potential harm. One explanation for these disappointing results is that  
574 distinct components of the innate immune system differentially contribute to disease  
575 pathogenesis, tissue homeostasis and repair. If this holds true, strategies that broadly  
576 target the innate immune system may have competing effects of not only limiting  
577 myocardial inflammation, but also, suppressing beneficial innate immune functions such  
578 as cardiac tissue repair.

579

580 Indeed, previous studies have strongly supported the division of labor concept in regards  
581 to cardiac macrophages, which are the most abundant innate immune cell population  
582 within the mouse and human heart (Bajpai et al., 2018; Epelman et al., 2014a; Pinto et  
583 al., 2016; Pinto et al., 2012). In this manuscript, we provide evidence that tissue resident  
584 CCR2- cardiac macrophages represent a protective population that mediates adaptive  
585 remodeling and survival of the chronically failing heart. By employing a mouse model of

586 dilated cardiomyopathy harboring a causative human mutation, we demonstrate that  
587 CCR2- macrophages were essential to maintain adequate cardiac output in the setting  
588 of reduced cardiac contractility by promoting LV enlargement and expansion of the  
589 coronary system at the macrovascular and microvascular levels. Intriguingly, we  
590 revealed a novel mechanism of cardiac macrophage activation. Through formation of  
591 stable focal adhesion complexes with neighboring cardiomyocytes, CCR2- macrophages  
592 may sense mechanical stretch in response to elevated loading conditions (*i.e.*, LV end  
593 diastolic pressure). The contribution of focal adhesion complexes to mechanosensing is  
594 well established (Geiger et al., 2009). Consistent with this notion, inhibition of the  
595 mechanosensitive channel, TRPV4, drastically reduced CCR2- macrophage pro-  
596 angiogenic growth factor expression and prevented coronary angiogenesis and  
597 myocardial tissue remodeling in our mouse model of dilated cardiomyopathy.  
598 Collectively, these findings establish an unanticipated role for cardiac macrophages in  
599 adaptive remodeling of the chronically failing heart and introduce a new mechanism of  
600 cardiac macrophage activation through sensing of myocardial stretch.

601

602 These findings have several important implications for the cardiovascular field. First, it is  
603 widely recognized that LV dilation is one of the strongest predictors of heart failure  
604 outcomes including mortality (Merlo et al., 2011). Whether this represents an associative  
605 or causative relationship is not immediately apparent and ultimately may depend on the  
606 underlying pathology and clinical context. Our observations indicate that LV dilation may  
607 be adaptive in some scenarios as it preserved cardiac output through augmentation of  
608 stroke volume. Second, previous studies have demonstrated that CCR2- macrophages  
609 remain abundant within the myocardium of patients with chronic heart failure (Bajpai et  
610 al., 2018). However, their function within this context was unknown. Using a mouse  
611 model of genetic dilated cardiomyopathy, we reveal an indispensable role for CCR2-



612 macrophages. Depletion of CCR2- macrophages blunted myocardial tissue  
613 reorganization, cardiomyocyte lengthening, LV chamber enlargement, and coronary  
614 angiogenesis. Markers of pathological hypertrophy including increased cardiomyocyte  
615 cross-sectional area and fetal gene expression were not affected. These data further  
616 substantiate the division of labor between CCR2- and CCR2+ cardiac macrophage  
617 populations and highlight dichotomous contributions to disease pathogenesis and  
618 protective adaptations, respectively (Bajpai et al., 2019; Dick et al., 2019; Epelman et al.,  
619 2014a; Hulsmans et al., 2018; Lavine et al., 2014; Leid et al., 2016). Therapeutically,  
620 these findings indicate the need to develop strategies that preserve or enhance the  
621 function of CCR2- macrophages. Such an approach may enhance coronary  
622 angiogenesis and favor adaptive forms of LV remodeling, thus providing additive benefit  
623 to established medications for heart failure (ACE inhibitors, ARNIs, beta blockers,  
624 aldosterone antagonists), which target a separate mechanism (adverse remodeling).

625

626 Exciting work has recently implicated cardiac macrophages in facilitating electrical  
627 conduction, particularly through the atrioventricular node (Hulsmans et al., 2017). Using  
628 surface electrocardiography, we did not observe arrhythmias or clear alterations in PR,  
629 RR, or QT intervals following depletion of CCR2- macrophages. These data do not  
630 exclude the possibility that CCR2- and/or CCR2+ macrophages participate in aspects of  
631 cardiac pacemaker function, electrical propagation, or arrhythmia susceptibility in our  
632 dilated cardiomyopathy model. Additional depletion models and dedicated  
633 electrophysiology studies including appropriate provocative maneuvers will be required  
634 to address these important questions.

635

636

637 This study also provides new insights into the properties and functions of tissue resident  
638 macrophages. Specifically, we found that CCR2- macrophages within the LV

639 myocardium display a stereotyped morphology where they interact with neighboring  
640 cardiomyocytes through the formation of focal adhesion complexes. It is not yet clear  
641 whether macrophages interact with the cardiomyocyte basement membrane or directly  
642 with cardiomyocytes themselves. Regardless, these structures are stable over time and  
643 have the potential to serve as sensors of mechanical deformations such as increased  
644 wall tension that may occur in the context of elevated preload or afterload. Consistent  
645 with this concept, we found that mechanical stretch serves as a stimulus for pro-  
646 angiogenic growth factor expression, a process that was dependent on the  
647 mechanoresponsive TRPV4 channel. This observation suggests that a key function of  
648 CCR2- macrophages may be to sense hemodynamic alterations and promote adaptive  
649 tissue remodeling. Future work will clarify the breadth of hemodynamic stimuli that might  
650 activate CCR2- macrophages, identify the exact signaling pathways triggered by TRPV4  
651 channel activity, and determine whether this mechanism might be active in regions of the  
652 heart other than the LV.

653

654 As TRPV4 has been implicated in alveolar and intestinal macrophages (Hamanaka et  
655 al., 2010; Luo et al., 2018; Pairet et al., 2018), sensing of mechanical tissue deformation  
656 may constitute a conserved role of tissue resident macrophages throughout the body.  
657 The ability to directly interact with parenchymal cells and sensing mechanical inputs may  
658 reflect an additional division of labor between tissue resident and infiltrating monocyte-  
659 derived macrophages. TRPV4 may also play an essential role in phagocytosis-induced  
660 inflammation a mechanism that is involved in clearance of cellular debris following tissue  
661 injury (Dutta et al., 2020; Goswami et al., 2019; Mannaa et al., 2018; Scheraga et al.,  
662 2016). Interestingly, we found that activation of TRPV4 by cyclic mechanical stretch was  
663 not dependent on MYD88 or TRIF signaling. A recent manuscript has suggested that

664 Piezo1 activation may trigger TRPV4 channel opening providing a more direct link to  
665 mechanical stimulation (Swain et al., 2020).

666

667 Our study is not without limitations. We primarily focused on a genetic mouse model of  
668 dilated cardiomyopathy. It remains to be shown whether CCR2- macrophages function in  
669 a similar manner in other non-ischemic and ischemic heart failure models. Based on  
670 available literature (Bajpai et al., 2019), we chose to employ CD169-DTR mice to  
671 deplete CCR2- macrophages. This line depletes other macrophage populations outside  
672 of the heart and we cannot rule out the possibility that extra-cardiac macrophage  
673 populations contribute to some of the observed phenotypes. Finally, while CCR2-  
674 macrophages represent the most abundant cell type that express active TRPV4  
675 channels, we cannot exclude the possibility that TRPV4 may also influence the function  
676 of other cell types within the heart. TRPV4 was expressed in CCR2+ macrophages,  
677 neutrophils, and in a small population of cardiac endothelial cells. The impact of TRPV4  
678 in these cell types remains to be elucidated.

679

680 In conclusion, our findings establish a role for tissue resident CCR2- macrophages in  
681 adaptive cardiac tissue remodeling and survival of the chronically failing heart.

682 Furthermore, we provide initial evidence of a novel mechanism of cardiac macrophage  
683 activation, whereby CCR2- macrophages sense myocardial stretch through a TRPV4  
684 dependent pathway.

685 **Acknowledgments**

686 This project was made possible by funding provided from the Children's Discovery  
687 Institute of Washington University and St. Louis Children's Hospital (CH-II-2015-462,  
688 CH-II-2017-628), Foundation of Barnes-Jewish Hospital (8038-88), and the NHLBI (R01  
689 HL138466, R01 HL139714). K.J.L. is supported by Burroughs Welcome Fund  
690 (1014782). Histology was performed in the DDRCC advanced imaging and tissue  
691 analysis core supported by Grant #P30 DK52574. Imaging was performed in the  
692 Washington University Center for Cellular Imaging (WUCCI) which is funded, in part by  
693 the Children's Discovery Institute of Washington University and St. Louis Children's  
694 Hospital (CDI-CORE-2015-505 and CDI-CORE-2019-813) and the Foundation for  
695 Barnes-Jewish Hospital (3770). D.K. is supported by NIH P01AI116501 and R01  
696 HL094601, Veterans Administration Merit Review grant 1I01BX002730 and The  
697 Foundation for Barnes-Jewish Hospital. We acknowledge the McDonnell Genome  
698 Institute for their assistance in designing and performing the micro array and RNA  
699 sequencing analysis. We recognize the mouse cardiovascular phenotyping core for  
700 performing echocardiography and invasive hemodynamics studies. B.J. Kopecky was  
701 supported by the Principles in Cardiovascular Research Training Grant (T32 HL007081)  
702 and the Washington University Physician Scientist Training Program. H.H. was  
703 supported by grants from the NIH, R01DK103901, R01AR077183, and R01AA027065,  
704 the Department of Anesthesiology at Washington University School of Medicine. Y.L. is  
705 supported by NIH R35HL145212 and R01HL131908. XRM data was generated on a  
706 Zeiss Xradia Versa 520 3D X-Ray microscope which was purchased with support from  
707 the Office of Research Infrastructure Programs (ORIP), a part of the NIH Office of the  
708 Director under grant OD021694.

709

710

711 **Author Contributions**

712 N.W., J.M., B.K., and S.G. performed the immunostaining, blood vessel casting,  
713 histology, RNA sequencing, and cell culture experiments. G.B, A.B., and O.D. performed  
714 the flow cytometry experiments. S.G. and B.K. performed the 2-photon imaging studies.  
715 H.L. and Y.L. performed the PET imaging studies and processed the data. L.E. and L.B.  
716 assisted in the cull culture experiments. I.K. and J.L. assisted in the macrophage  
717 depletion and performed the mitochondrial respiration studies. N.P. assisted in analysis  
718 of the ECG studies. S.M. provided Tnnt2<sup>AK210</sup> mice. M.R.F, P.O.B. and J.A.J.F.  
719 performed the x-ray microscopy studies. L.D. and H.H. performed the ratiometric calcium  
720 imaging studies. C.M, A.K., J.M.N. performed the cardiac catheterization experiments.  
721 S.E., D.K., and R.S. assisted with experimental design and critical review of the  
722 manuscript. K.L. is responsible for all aspects of this manuscript including experimental  
723 design, data analysis, and manuscript production.

724

725 **Competing Interest Statement**

726 The authors have no financial or competing interests to disclose.

727

728

729

730  
731  
732  
733  
734  
735  
736  
737  
738  
739  
740  
741  
742  
743  
744  
745  
746  
747  
748  
749  
750  
751  
752  
753  
754  
755  
756  
757  
758  
759  
760  
761  
762  
763  
764  
765  
766  
767  
768  
769  
770  
771  
772  
773  
774  
775  
776  
777  
778  
779  
780

## REFERENCES:

- Aurora, A.B., Porrello, E.R., Tan, W., Mahmoud, A.I., Hill, J.A., Bassel-Duby, R., Sadek, H.A., and Olson, E.N. (2014). Macrophages are required for neonatal heart regeneration. *J Clin Invest* 124, 1382-1392.
- Bain, C.C., Scott, C.L., Uronen-Hansson, H., Gudjonsson, S., Jansson, O., Grip, O., Williams, M., Malissen, B., Agace, W.W., and Mowat, A.M. (2013). Resident and pro-inflammatory macrophages in the colon represent alternative context-dependent fates of the same Ly6Chi monocyte precursors. *Mucosal Immunol* 6, 498-510.
- Bajpai, G., Bredemeyer, A., Li, W., Zaitsev, K., Koenig, A.L., Lokshina, I., Mohan, J., Ivey, B., Hsiao, H.M., Weinheimer, C., *et al.* (2019). Tissue Resident CCR2- and CCR2+ Cardiac Macrophages Differentially Orchestrate Monocyte Recruitment and Fate Specification Following Myocardial Injury. *Circ Res* 124, 263-278.
- Bajpai, G., Schneider, C., Wong, N., Bredemeyer, A., Hulsmans, M., Nahrendorf, M., Epelman, S., Kreisel, D., Liu, Y., Itoh, A., *et al.* (2018). The human heart contains distinct macrophage subsets with divergent origins and functions. *Nat Med*.
- Boyer, S.W., Schroeder, A.V., Smith-Berdan, S., and Forsberg, E.C. (2011). All hematopoietic cells develop from hematopoietic stem cells through Flk2/Flt3-positive progenitor cells. *Cell Stem Cell* 9, 64-73.
- Burchfield, J.S., Xie, M., and Hill, J.A. (2013). Pathological ventricular remodeling: mechanisms: part 1 of 2. *Circulation* 128, 388-400.
- Chow, A., Lucas, D., Hidalgo, A., Mendez-Ferrer, S., Hashimoto, D., Scheiermann, C., Battista, M., Leboeuf, M., Prophete, C., van Rooijen, N., *et al.* (2011). Bone marrow CD169+ macrophages promote the retention of hematopoietic stem and progenitor cells in the mesenchymal stem cell niche. *J Exp Med* 208, 261-271.
- Chung, E.S., Packer, M., Lo, K.H., Fasanmade, A.A., Willerson, J.T., and Anti, T.N.F.T.A.C.H.F.I. (2003). Randomized, double-blind, placebo-controlled, pilot trial of infliximab, a chimeric monoclonal antibody to tumor necrosis factor- $\alpha$ , in patients with moderate-to-severe heart failure: results of the anti-TNF Therapy Against Congestive Heart Failure (ATTACH) trial. *Circulation* 107, 3133-3140.
- Clippinger, S.R., Cloonan, P.E., Greenberg, L., Ernst, M., Stump, W.T., and Greenberg, M.J. (2019). Disrupted mechanobiology links the molecular and cellular phenotypes in familial dilated cardiomyopathy. *Proc Natl Acad Sci U S A* 116, 17831-17840.
- Cohn, J.N., Ferrari, R., and Sharpe, N. (2000). Cardiac remodeling--concepts and clinical implications: a consensus paper from an international forum on cardiac remodeling. Behalf of an International Forum on Cardiac Remodeling. *J Am Coll Cardiol* 35, 569-582.
- Davies, L.C., Jenkins, S.J., Allen, J.E., and Taylor, P.R. (2013). Tissue-resident macrophages. *Nat Immunol* 14, 986-995.
- Dick, S.A., Macklin, J.A., Nejat, S., Momen, A., Clemente-Casares, X., Althagafi, M.G., Chen, J., Kantores, C., Hosseinzadeh, S., Aronoff, L., *et al.* (2019). Self-renewing resident cardiac macrophages limit adverse remodeling following myocardial infarction. *Nat Immunol* 20, 29-39.
- Du, C.K., Morimoto, S., Nishii, K., Minakami, R., Ohta, M., Tadano, N., Lu, Q.W., Wang, Y.Y., Zhan, D.Y., Mochizuki, M., *et al.* (2007). Knock-in mouse model of dilated cardiomyopathy caused by troponin mutation. *Circ Res* 101, 185-194.
- Ducharme, A., Frantz, S., Aikawa, M., Rabkin, E., Lindsey, M., Rohde, L.E., Schoen, F.J., Kelly, R.A., Werb, Z., Libby, P., *et al.* (2000). Targeted deletion of matrix metalloproteinase-9 attenuates left ventricular enlargement and collagen accumulation after experimental myocardial infarction. *J Clin Invest* 106, 55-62.

- 781 Dutta, B., Arya, R.K., Goswami, R., Alharbi, M.O., Sharma, S., and Rahaman,  
782 S.O. (2020). Role of macrophage TRPV4 in inflammation. *Lab Invest* 100, 178-185.
- 783 Epelman, S., Lavine, K.J., Beaudin, A.E., Sojka, D.K., Carrero, J.A., Calderon,  
784 B., Brija, T., Gautier, E.L., Ivanov, S., Satpathy, A.T., *et al.* (2014a). Embryonic and  
785 adult-derived resident cardiac macrophages are maintained through distinct  
786 mechanisms at steady state and during inflammation. *Immunity* 40, 91-104.
- 787 Epelman, S., Lavine, K.J., and Randolph, G.J. (2014b). Origin and functions of  
788 tissue macrophages. *Immunity* 41, 21-35.
- 789 Fantin, A., Vieira, J.M., Gestri, G., Denti, L., Schwarz, Q., Prykhozhij, S., Peri, F.,  
790 Wilson, S.W., and Ruhrberg, C. (2010). Tissue macrophages act as cellular chaperones  
791 for vascular anastomosis downstream of VEGF-mediated endothelial tip cell induction.  
792 *Blood* 116, 829-840.
- 793 Geiger, B., Spatz, J.P., and Bershadsky, A.D. (2009). Environmental sensing  
794 through focal adhesions. *Nat Rev Mol Cell Biol* 10, 21-33.
- 795 Ginhoux, F., Greter, M., Leboeuf, M., Nandi, S., See, P., Gokhan, S., Mehler,  
796 M.F., Conway, S.J., Ng, L.G., Stanley, E.R., *et al.* (2010). Fate mapping analysis reveals  
797 that adult microglia derive from primitive macrophages. *Science* 330, 841-845.
- 798 Godwin, J.W., Debuque, R., Salimova, E., and Rosenthal, N.A. (2017). Heart  
799 regeneration in the salamander relies on macrophage-mediated control of fibroblast  
800 activation and the extracellular landscape. *NPJ Regen Med* 2.
- 801 Godwin, J.W., Pinto, A.R., and Rosenthal, N.A. (2013). Macrophages are  
802 required for adult salamander limb regeneration. *Proc Natl Acad Sci U S A* 110, 9415-  
803 9420.
- 804 Goswami, R., Arya, R.K., Biswas, D., Zhu, X., and Rahaman, S.O. (2019).  
805 Transient Receptor Potential Vanilloid 4 Is Required for Foreign Body Response and  
806 Giant Cell Formation. *Am J Pathol* 189, 1505-1512.
- 807 Guilliams, M., De Kleer, I., Henri, S., Post, S., Vanhoutte, L., De Prijck, S.,  
808 Deswarte, K., Malissen, B., Hammad, H., and Lambrecht, B.N. (2013). Alveolar  
809 macrophages develop from fetal monocytes that differentiate into long-lived cells in the  
810 first week of life via GM-CSF. *J Exp Med* 210, 1977-1992.
- 811 Hamanaka, K., Jian, M.Y., Townsley, M.I., King, J.A., Liedtke, W., Weber, D.S.,  
812 Eyal, F.G., Clapp, M.M., and Parker, J.C. (2010). TRPV4 channels augment  
813 macrophage activation and ventilator-induced lung injury. *Am J Physiol Lung Cell Mol*  
814 *Physiol* 299, L353-362.
- 815 Hashimoto, D., Chow, A., Noizat, C., Teo, P., Beasley, M.B., Leboeuf, M.,  
816 Becker, C.D., See, P., Price, J., Lucas, D., *et al.* (2013). Tissue-resident macrophages  
817 self-maintain locally throughout adult life with minimal contribution from circulating  
818 monocytes. *Immunity* 38, 792-804.
- 819 Heo, G.S., Kopecky, B., Sultan, D., Ou, M., Feng, G., Bajpai, G., Zhang, X.,  
820 Luehmann, H., Detering, L., Su, Y., *et al.* (2019). Molecular Imaging Visualizes  
821 Recruitment of Inflammatory Monocytes and Macrophages to the Injured Heart. *Circ*  
822 *Res*.
- 823 Hettlinger, J., Richards, D.M., Hansson, J., Barra, M.M., Joschko, A.C.,  
824 Krijgsveld, J., and Feuerer, M. (2013). Origin of monocytes and macrophages in a  
825 committed progenitor. *Nat Immunol* 14, 821-830.
- 826 Heymans, S., Lutun, A., Nuyens, D., Theilmeier, G., Creemers, E., Moons, L.,  
827 Dyspersin, G.D., Cleutjens, J.P., Shipley, M., Angellilo, A., *et al.* (1999). Inhibition of  
828 plasminogen activators or matrix metalloproteinases prevents cardiac rupture but  
829 impairs therapeutic angiogenesis and causes cardiac failure. *Nat Med* 5, 1135-1142.
- 830 Hoeffel, G., Chen, J., Lavin, Y., Low, D., Almeida, F.F., See, P., Beaudin, A.E.,  
831 Lum, J., Low, I., Forsberg, E.C., *et al.* (2015). C-Myb(+) erythro-myeloid progenitor-

832 derived fetal monocytes give rise to adult tissue-resident macrophages. *Immunity* *42*,  
833 665-678.

834 Hoeffel, G., Wang, Y., Greter, M., See, P., Teo, P., Malleret, B., Leboeuf, M.,  
835 Low, D., Oller, G., Almeida, F., *et al.* (2012). Adult Langerhans cells derive  
836 predominantly from embryonic fetal liver monocytes with a minor contribution of yolk  
837 sac-derived macrophages. *J Exp Med* *209*, 1167-1181.

838 Hulsmans, M., Clauss, S., Xiao, L., Aguirre, A.D., King, K.R., Hanley, A., Hucker,  
839 W.J., Wulfers, E.M., Seemann, G., Courties, G., *et al.* (2017). Macrophages Facilitate  
840 Electrical Conduction in the Heart. *Cell* *169*, 510-522 e520.

841 Hulsmans, M., Sager, H.B., Roh, J.D., Valero-Munoz, M., Houstis, N.E.,  
842 Iwamoto, Y., Sun, Y., Wilson, R.M., Wojtkiewicz, G., Tricot, B., *et al.* (2018). Cardiac  
843 macrophages promote diastolic dysfunction. *J Exp Med* *215*, 423-440.

844 Lavine, K.J., Epelman, S., Uchida, K., Weber, K.J., Nichols, C.G., Schilling, J.D.,  
845 Ornitz, D.M., Randolph, G.J., and Mann, D.L. (2014). Distinct macrophage lineages  
846 contribute to disparate patterns of cardiac recovery and remodeling in the neonatal and  
847 adult heart. *Proc Natl Acad Sci U S A* *111*, 16029-16034.

848 Lavine, K.J., Kovacs, A., Weinheimer, C., and Mann, D.L. (2013). Repetitive  
849 myocardial ischemia promotes coronary growth in the adult mammalian heart. *J Am*  
850 *Heart Assoc* *2*, e000343.

851 Leid, J., Carrelha, J., Boukarabila, H., Epelman, S., Jacobsen, S.E., and Lavine,  
852 K.J. (2016). Primitive Embryonic Macrophages are Required for Coronary Development  
853 and Maturation. *Circ Res* *118*, 1498-1511.

854 Li, W., Hsiao, H.M., Higashikubo, R., Saunders, B.T., Bharat, A., Goldstein, D.R.,  
855 Krupnick, A.S., Gelman, A.E., Lavine, K.J., and Kreisel, D. (2016). Heart-resident  
856 CCR2(+) macrophages promote neutrophil extravasation through TLR9/MyD88/CXCL5  
857 signaling. *JCI Insight* *1*.

858 Luehmann, H.P., Pressly, E.D., Detering, L., Wang, C., Pierce, R., Woodard,  
859 P.K., Gropler, R.J., Hawker, C.J., and Liu, Y. (2014). PET/CT imaging of chemokine  
860 receptor CCR5 in vascular injury model using targeted nanoparticle. *J Nucl Med* *55*, 629-  
861 634.

862 Luo, J., Qian, A., Oetjen, L.K., Yu, W., Yang, P., Feng, J., Xie, Z., Liu, S., Yin, S.,  
863 Dryn, D., *et al.* (2018). TRPV4 Channel Signaling in Macrophages Promotes  
864 Gastrointestinal Motility via Direct Effects on Smooth Muscle Cells. *Immunity* *49*, 107-  
865 119 e104.

866 Madisen, L., Garner, A.R., Shimaoka, D., Chuong, A.S., Klapoetke, N.C., Li, L.,  
867 van der Bourg, A., Niino, Y., Egolf, L., Monetti, C., *et al.* (2015). Transgenic mice for  
868 intersectional targeting of neural sensors and effectors with high specificity and  
869 performance. *Neuron* *85*, 942-958.

870 Mann, D.L. (2015). Innate immunity and the failing heart: the cytokine hypothesis  
871 revisited. *Circ Res* *116*, 1254-1268.

872 Manna, M., Marko, L., Balogh, A., Vigolo, E., N'Diaye, G., Kassmann, M.,  
873 Michalick, L., Weichelt, U., Schmidt-Ott, K.M., Liedtke, W.B., *et al.* (2018). Transient  
874 Receptor Potential Vanilloid 4 Channel Deficiency Aggravates Tubular Damage after  
875 Acute Renal Ischaemia Reperfusion. *Sci Rep* *8*, 4878.

876 McNally, E.M., and Mestroni, L. (2017). Dilated Cardiomyopathy: Genetic  
877 Determinants and Mechanisms. *Circ Res* *121*, 731-748.

878 Merlo, M., Pyxaras, S.A., Pinamonti, B., Barbati, G., Di Lenarda, A., and Sinagra,  
879 G. (2011). Prevalence and prognostic significance of left ventricular reverse remodeling  
880 in dilated cardiomyopathy receiving tailored medical treatment. *J Am Coll Cardiol* *57*,  
881 1468-1476.



- 882 Morimoto, S., Lu, Q.W., Harada, K., Takahashi-Yanaga, F., Minakami, R., Ohta,  
883 M., Sasaguri, T., and Ohtsuki, I. (2002). Ca(2+)-desensitizing effect of a deletion  
884 mutation Delta K210 in cardiac troponin T that causes familial dilated cardiomyopathy.  
885 Proc Natl Acad Sci U S A 99, 913-918.
- 886 Munoz-Espin, D., Canamero, M., Maraver, A., Gomez-Lopez, G., Contreras, J.,  
887 Murillo-Cuesta, S., Rodriguez-Baeza, A., Varela-Nieto, I., Ruberte, J., Collado, M., *et al.*  
888 (2013). Programmed cell senescence during mammalian embryonic development. Cell  
889 155, 1104-1118.
- 890 Murphy, S.P., Kakkar, R., McCarthy, C.P., and Januzzi, J.L., Jr. (2020).  
891 Inflammation in Heart Failure: JACC State-of-the-Art Review. J Am Coll Cardiol 75,  
892 1324-1340.
- 893 Nakamura, M., and Sadoshima, J. (2018). Mechanisms of physiological and  
894 pathological cardiac hypertrophy. Nat Rev Cardiol 15, 387-407.
- 895 Nicolas-Avila, J.A., Lechuga-Vieco, A.V., Esteban-Martinez, L., Sanchez-Diaz,  
896 M., Diaz-Garcia, E., Santiago, D.J., Rubio-Ponce, A., Li, J.L., Balachander, A., Quintana,  
897 J.A., *et al.* (2020). A Network of Macrophages Supports Mitochondrial Homeostasis in  
898 the Heart. Cell 183, 94-109 e123.
- 899 Pairet, N., Mang, S., Fois, G., Keck, M., Kuhnbach, M., Gindele, J., Frick, M.,  
900 Dietl, P., and Lamb, D.J. (2018). TRPV4 inhibition attenuates stretch-induced  
901 inflammatory cellular responses and lung barrier dysfunction during mechanical  
902 ventilation. PLoS One 13, e0196055.
- 903 Parkhurst, C.N., Yang, G., Ninan, I., Savas, J.N., Yates, J.R., 3rd, Lafaille, J.J.,  
904 Hempstead, B.L., Littman, D.R., and Gan, W.B. (2013). Microglia promote learning-  
905 dependent synapse formation through brain-derived neurotrophic factor. Cell 155, 1596-  
906 1609.
- 907 Parrillo, J.E., Cunnion, R.E., Epstein, S.E., Parker, M.M., Suffredini, A.F.,  
908 Brenner, M., Schaer, G.L., Palmeri, S.T., Cannon, R.O., 3rd, Alling, D., *et al.* (1989). A  
909 prospective, randomized, controlled trial of prednisone for dilated cardiomyopathy. N  
910 Engl J Med 321, 1061-1068.
- 911 Parsons, J.T., Horwitz, A.R., and Schwartz, M.A. (2010). Cell adhesion:  
912 integrating cytoskeletal dynamics and cellular tension. Nat Rev Mol Cell Biol 11, 633-  
913 643.
- 914 Patel, B., Bansal, S.S., Ismahil, M.A., Hamid, T., Rokosh, G., Mack, M., and  
915 Prabhu, S.D. (2018). CCR2(+) Monocyte-Derived Infiltrating Macrophages Are Required  
916 for Adverse Cardiac Remodeling During Pressure Overload. JACC Basic Transl Sci 3,  
917 230-244.
- 918 Patel, M.D., Mohan, J., Schneider, C., Bajpai, G., Purevjav, E., Canter, C.E.,  
919 Towbin, J., Bredemeyer, A., and Lavine, K.J. (2017). Pediatric and adult dilated  
920 cardiomyopathy represent distinct pathological entities. JCI Insight 2.
- 921 Petrie, T.A., Strand, N.S., Yang, C.T., Rabinowitz, J.S., and Moon, R.T. (2014).  
922 Macrophages modulate adult zebrafish tail fin regeneration. Development 141, 2581-  
923 2591.
- 924 Pinto, A.R., Ilinykh, A., Ivey, M.J., Kuwabara, J.T., D'Antoni, M.L., Debuque, R.,  
925 Chandran, A., Wang, L., Arora, K., Rosenthal, N.A., *et al.* (2016). Revisiting Cardiac  
926 Cellular Composition. Circ Res 118, 400-409.
- 927 Pinto, A.R., Paolicelli, R., Salimova, E., Gospocic, J., Slonimsky, E., Bilbao-  
928 Cortes, D., Godwin, J.W., and Rosenthal, N.A. (2012). An abundant tissue macrophage  
929 population in the adult murine heart with a distinct alternatively-activated macrophage  
930 profile. PLoS One 7, e36814.
- 931 Satpathy, A.T., Briseno, C.G., Lee, J.S., Ng, D., Manieri, N.A., Kc, W., Wu, X.,  
932 Thomas, S.R., Lee, W.L., Turkoz, M., *et al.* (2013). Notch2-dependent classical dendritic

933 cells orchestrate intestinal immunity to attaching-and-effacing bacterial pathogens. *Nat*  
934 *Immunol* *14*, 937-948.

935 Scheraga, R.G., Abraham, S., Niese, K.A., Southern, B.D., Grove, L.M., Hite,  
936 R.D., McDonald, C., Hamilton, T.A., and Olman, M.A. (2016). TRPV4 Mechanosensitive  
937 Ion Channel Regulates Lipopolysaccharide-Stimulated Macrophage Phagocytosis. *J*  
938 *Immunol* *196*, 428-436.

939 Soares, M.P., and Hamza, I. (2016). Macrophages and Iron Metabolism.  
940 *Immunity* *44*, 492-504.

941 Storer, M., Mas, A., Robert-Moreno, A., Pecoraro, M., Ortells, M.C., Di Giacomo,  
942 V., Yosef, R., Pilpel, N., Krizhanovsky, V., Sharpe, J., *et al.* (2013). Senescence is a  
943 developmental mechanism that contributes to embryonic growth and patterning. *Cell*  
944 *155*, 1119-1130.

945 Swain, S.M., Romac, J.M., Shahid, R.A., Pandol, S.J., Liedtke, W., Vigna, S.R.,  
946 and Liddle, R.A. (2020). TRPV4 channel opening mediates pressure-induced  
947 pancreatitis initiated by Piezo1 activation. *J Clin Invest* *130*, 2527-2541.

948 Theret, M., Mounier, R., and Rossi, F. (2019). The origins and non-canonical  
949 functions of macrophages in development and regeneration. *Development* *146*.

950 Wynn, T.A., Chawla, A., and Pollard, J.W. (2013). Macrophage biology in  
951 development, homeostasis and disease. *Nature* *496*, 445-455.

952 Xie, M., Burchfield, J.S., and Hill, J.A. (2013). Pathological ventricular  
953 remodeling: therapies: part 2 of 2. *Circulation* *128*, 1021-1030.

954 Yona, S., Kim, K.W., Wolf, Y., Mildner, A., Varol, D., Breker, M., Strauss-Ayali,  
955 D., Viukov, S., Guilliams, M., Misharin, A., *et al.* (2013). Fate mapping reveals origins  
956 and dynamics of monocytes and tissue macrophages under homeostasis. *Immunity* *38*,  
957 79-91.  
958

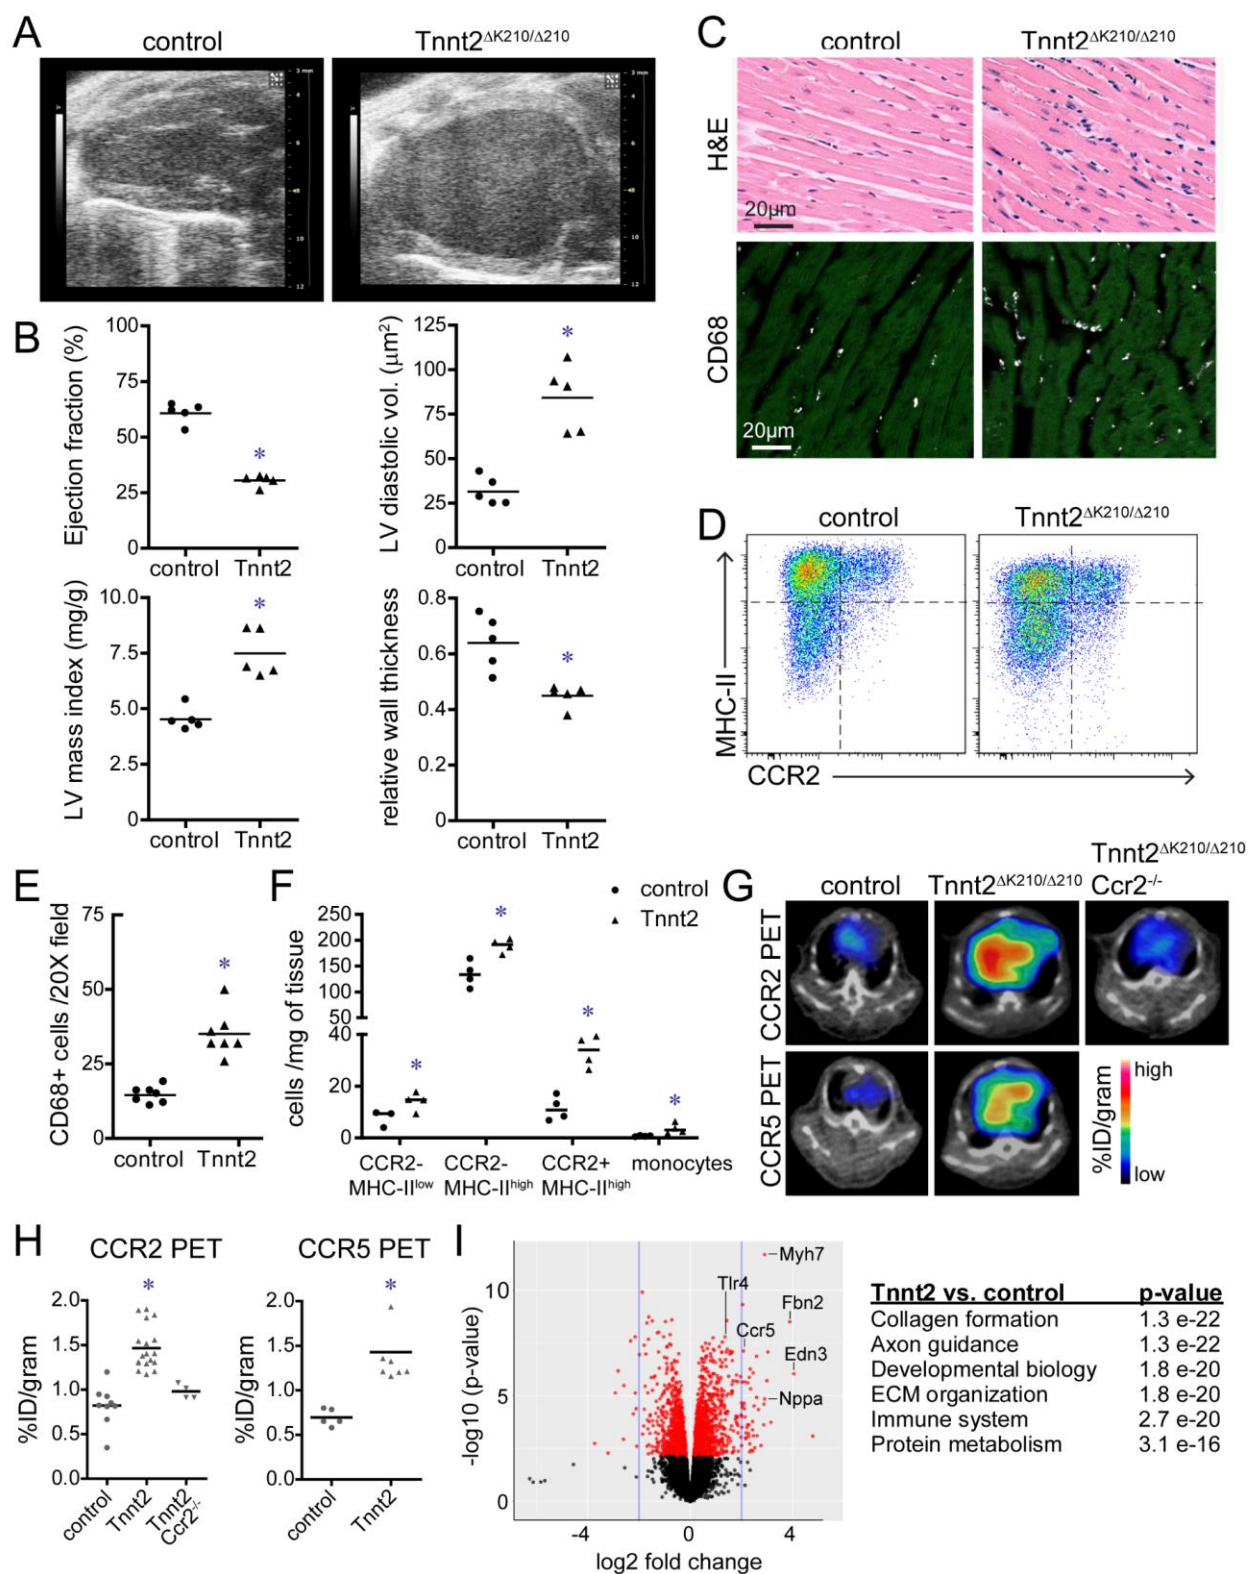

**Figure 1. Expansion of cardiac macrophages in a mouse model of dilated cardiomyopathy.** **A**, End-diastolic echocardiographic images of 8-week-old control and  $Tnnt2^{\Delta K210/\Delta K210}$  mice. **B**, Quantification of ejection fraction, LV diastolic dimension, LV mass index, and relative wall thickness. **C**, H&E (top) and immunostaining images (bottom, CD68-white, cardiac actin-green) of 8-week-old control and  $Tnnt2^{\Delta K210/\Delta K210}$  mice revealing expansion of cardiac macrophages in  $Tnnt2^{\Delta K210/\Delta K210}$  mice compared to controls. Representative images from  $n=7$  mice per experimental group. **D**, Representative flow cytometry plots of  $CD45^+Ly6G^-CD64^+$  macrophages showing increased abundance of CCR2- and CCR2+ macrophages in  $Tnnt2^{\Delta K210/\Delta K210}$  mice compared to controls at 8 weeks of age.  $n=4$  per experimental group. **E-F**, Quantification of CD68 immunostaining and flow cytometry. **G**, PET/CT images of control and  $Tnnt2^{\Delta K210/\Delta K210}$  mice (6-10 weeks of age) using CCR2 and CCR5 tracers showing tracer uptake in the hearts of  $Tnnt2^{\Delta K210/\Delta K210}$  mice. CCR2 signal is absent from  $Tnnt2^{\Delta K210/\Delta K210} Ccr2^{-/-}$  mice compared to controls.  $n=4-17$  per experimental group. PET: positron emission tomography, CT: computed tomography. **H**, Quantification of CCR2 and CCR5 tracer uptake within the heart. **I**, MA plot and pathway analysis of RNA sequencing data comparing control to  $Tnnt2^{\Delta K210/\Delta K210}$  hearts highlighting upregulated expression of transcripts associated with innate immunity in  $Tnnt2^{\Delta K210/\Delta K210}$  hearts.  $n=5-6$  per experimental group. For all panels, each data point denotes individual animals. \* denotes  $p<0.05$  (Mann-Whitney test) compared to controls.

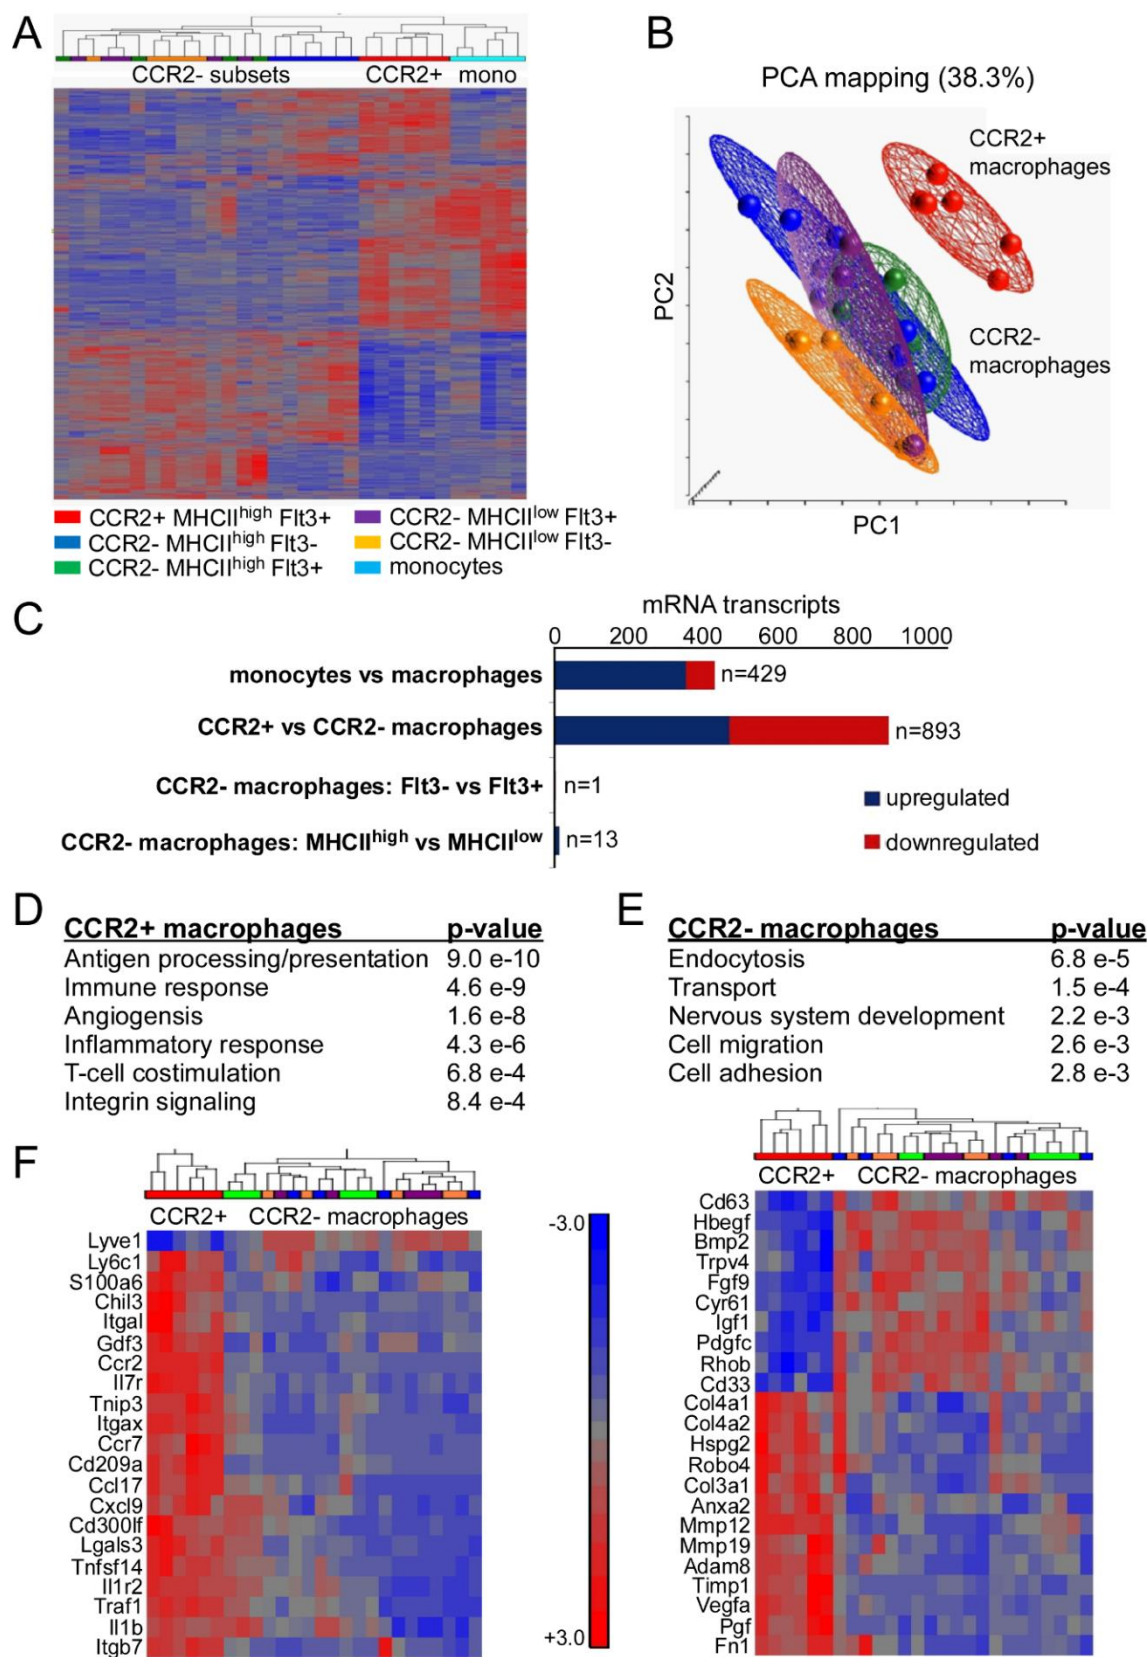

**Figure 2. CCR2- and CCR2+ macrophages have distinct gene expression profiles in dilated cardiomyopathy.** **A**, Hierarchical Clustering of CCR2+MHCII<sup>high</sup> Flt3+, CCR2-MHCII<sup>low</sup> Flt3-, CCR2-MHCII<sup>high</sup> Flt3-, CCR2-MHCII<sup>low</sup> Flt3+, CCR2-MHCII<sup>high</sup> Flt3+, and CCR2+Ly6C<sup>high</sup> monocytes FACS sorted from 8-week-old Tnnt2<sup>ΔK210/ΔK210</sup> mice. n=5-7 per experimental group. **B**, Principal component analysis (PCA) highlighting that CCR2+MHCII<sup>high</sup> Flt3+ macrophages cluster independently from each of the CCR2- macrophage populations. Each data point represents biologically independent samples. **C**, Bar graph showing the number of differentially expressed genes (FDR p<0.05, fold change>1.5) for each of the listed comparisons. Blue: upregulated in Tnnt2<sup>ΔK210/ΔK210</sup> mice. Red: down regulated in Tnnt2<sup>ΔK210/ΔK210</sup> mice. **D**, Pathways enriched in CCR2+ and CCR2- (all subgroups combined) macrophages. **F**, Heat maps listing individual genes differentially expressed in CCR2+ and CCR2- macrophages. Scale bar denotes fold change.

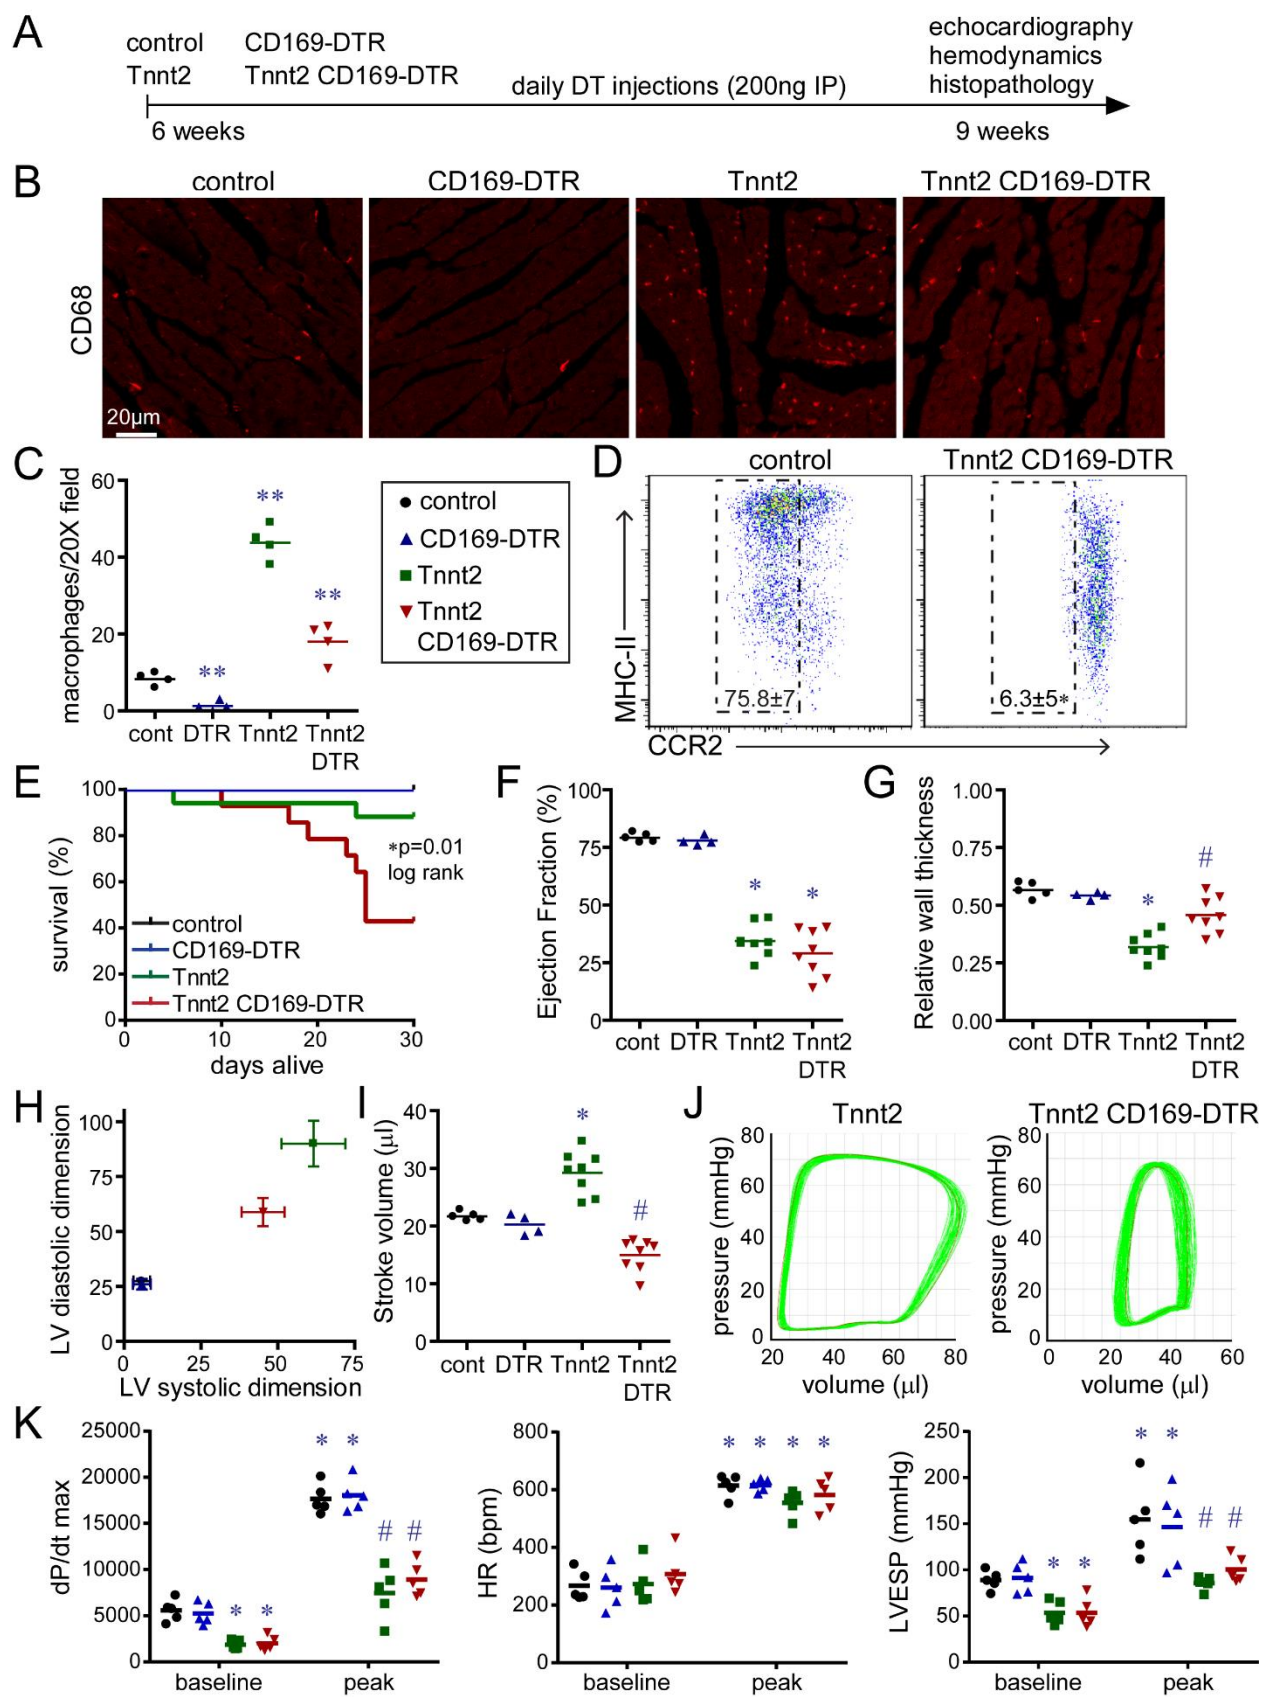

**Figure 3. CCR2- macrophages influence survival and LV remodeling in dilated cardiomyopathy.** **A**, Schematic outlining experimental groups, CCR2- macrophage depletion strategy, and analyzed endpoints. CCR2- macrophages were depleted by daily injection of diphtheria toxin (DT) into mice that expressed the diphtheria toxin receptor (DTR) under the control of the CD169 promoter. **B**, CD68 immunostaining of control, CD169-DTR,  $Tnnt2^{\Delta K210/\Delta K210}$ , and  $Tnnt2^{\Delta K210/\Delta K210}$  CD169-DTR hearts after 3 weeks of DT treatment. N=4 per experimental group. **C**, Quantification of CD68 immunostaining. **D**, Flow cytometry plot of CD45<sup>+</sup>Ly6G<sup>-</sup>CD64<sup>+</sup> macrophages showing specific depletion of CCR2- macrophages in  $Tnnt2^{\Delta K210/\Delta K210}$  CD169-DTR hearts compared to controls. N=4 per experimental group. **E**, Kaplan-Meier analysis demonstrating reduced survival of  $Tnnt2^{\Delta K210/\Delta K210}$  CD169-DTR compared to  $Tnnt2^{\Delta K210/\Delta K210}$  mice. No mortality was evident in control and CD169-DTR mice over the analyzed time period. n=12-15 per experimental group. **F-I**, Echocardiographic assessment of LV ejection fraction, relative wall thickness, LV volumes ( $\mu$ l), and stroke volume in control, CD169-DTR,  $Tnnt2^{\Delta K210/\Delta K210}$ , and  $Tnnt2^{\Delta K210/\Delta K210}$  CD169-DTR mice 3 weeks after DT treatment. n=4-8 per experimental group. **J**, Representative pressure volume loops showing reduced stroke volume in  $Tnnt2^{\Delta K210/\Delta K210}$  CD169-DTR compared to  $Tnnt2^{\Delta K210/\Delta K210}$  mice. n=4 per experimental group. **K**, Invasive hemodynamic measurements of LV dP/dt max, heart rate (HR), and LV end systolic pressure (LVESP) at baseline and during peak infusion of dobutamine (64 ng/min) in control, CD169-DTR,  $Tnnt2^{\Delta K210/\Delta K210}$ , and  $Tnnt2^{\Delta K210/\Delta K210}$  CD169-DTR mice 3 weeks after DT treatment. n=5 per experimental group. Each data point denotes independent animals. Error bars denote standard deviation. \* denotes p<0.05 (ANOVA, Post-hoc Tukey) compared to controls. # denotes p<0.05 compared to  $Tnnt2^{\Delta K210/\Delta K210}$  mice.



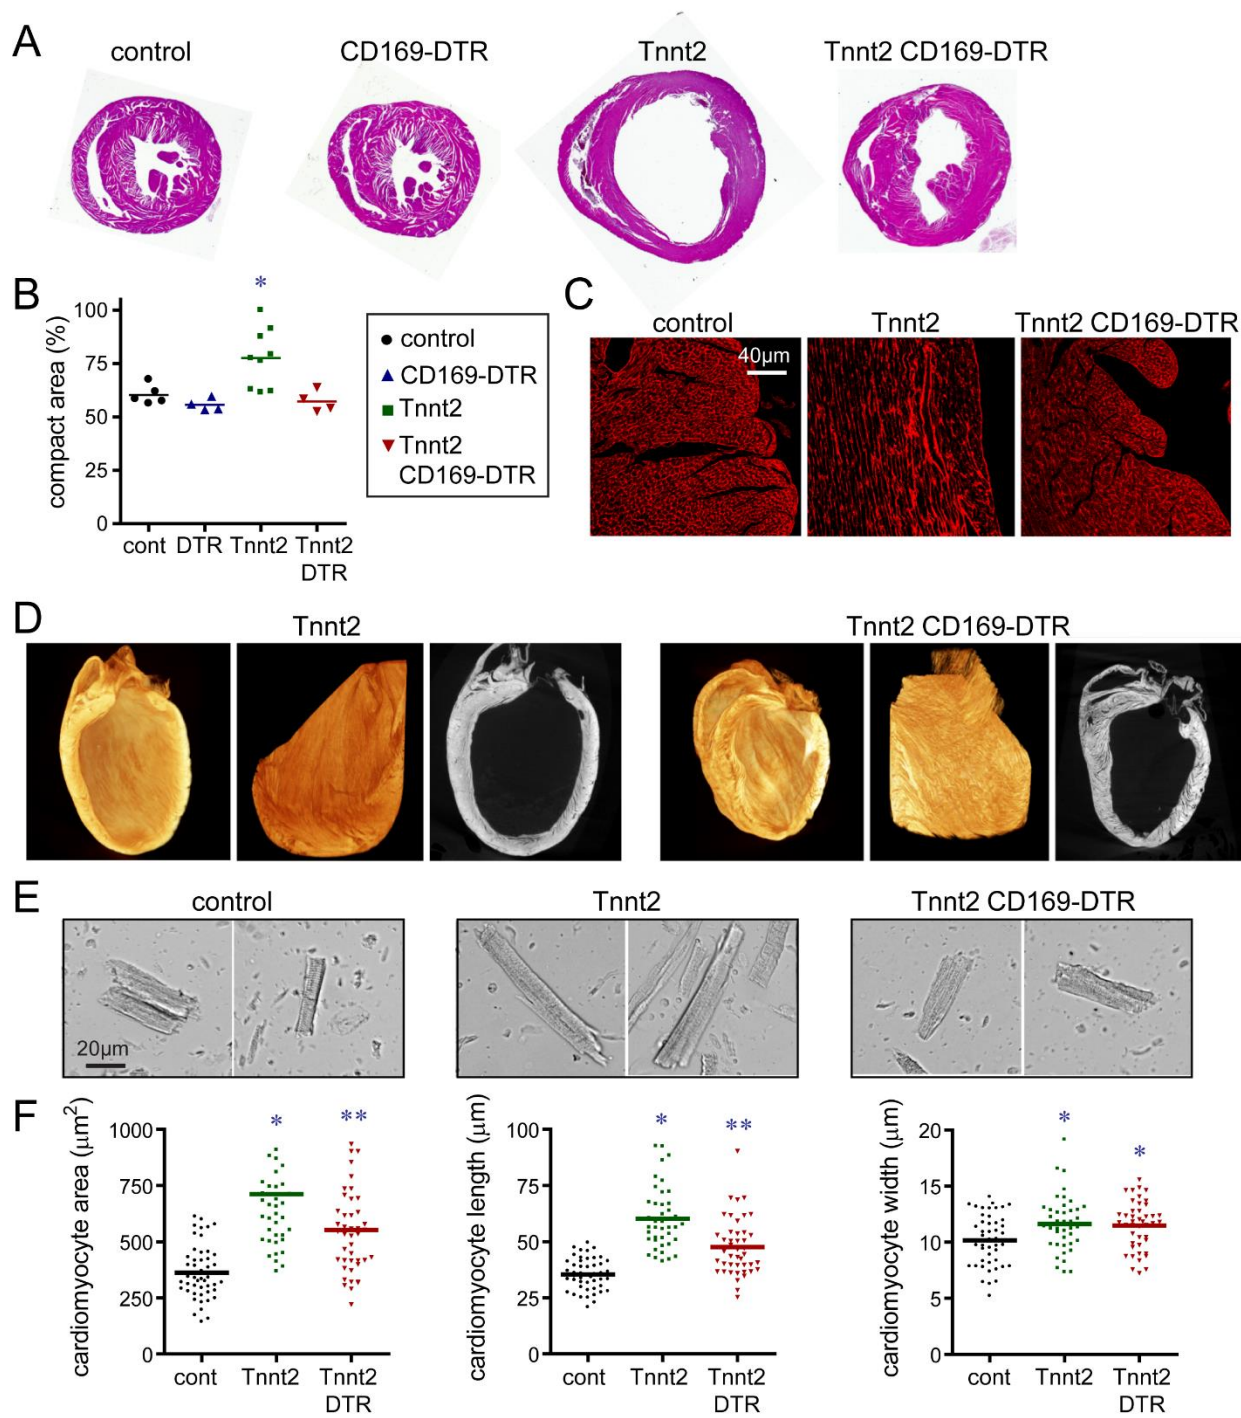

**Figure 4. CCR2- macrophages orchestrate myocardial tissue adaptations in dilated cardiomyopathy.** **A**, Low magnification H&E images of control, CD169-DTR, Tnnt2<sup>ΔK210/ΔK210</sup>, and Tnnt2<sup>ΔK210/ΔK210</sup> CD169-DTR hearts (LV in cross-section) after 3 weeks of DT treatment. n=4-9 per experimental group. **B**, Quantification of the ratio of compact to trabecular myocardium in control, CD169-DTR, Tnnt2<sup>ΔK210/ΔK210</sup>, and Tnnt2<sup>ΔK210/ΔK210</sup> CD169-DTR hearts. Each data point represents an individual animal. **C**, Wheat germ agglutinin (WGA, red) staining showing alterations in the alignment of trabecular cardiomyocytes in Tnnt2<sup>ΔK210/ΔK210</sup> compared to control hearts. The alignment of trabecular cardiomyocytes in Tnnt2<sup>ΔK210/ΔK210</sup> CD169-DTR hearts is indistinguishable from controls. n=4-9 per experimental group. **D**, Reconstructed X-ray microscopy images and virtual histology comparing the myocardial architecture of Tnnt2<sup>ΔK210/ΔK210</sup> and Tnnt2<sup>ΔK210/ΔK210</sup> CD169-DTR hearts following 3 weeks of DT injection. n=4 per experimental group. The endocardial surface of Tnnt2<sup>ΔK210/ΔK210</sup> hearts is smooth and compacted whereas the endocardial surface of Tnnt2<sup>ΔK210/ΔK210</sup> CD169-DTR hearts has a rougher and meshwork-like appearance. **E**, Images of cardiomyocytes digested from control, Tnnt2<sup>ΔK210/ΔK210</sup>, and Tnnt2<sup>ΔK210/ΔK210</sup> CD169-DTR hearts. Hearts were relaxed in potassium prior to fixation. **F**, Quantification of cardiomyocyte area, length, and width. Each data point represents individual cardiomyocytes analyzed from 4 independent animals per experimental group. \* denotes p<0.05 (ANOVA, Post-hoc Tukey) compared to controls. \*\* denotes p<0.05 compared to control and Tnnt2<sup>ΔK210/ΔK210</sup> mice.

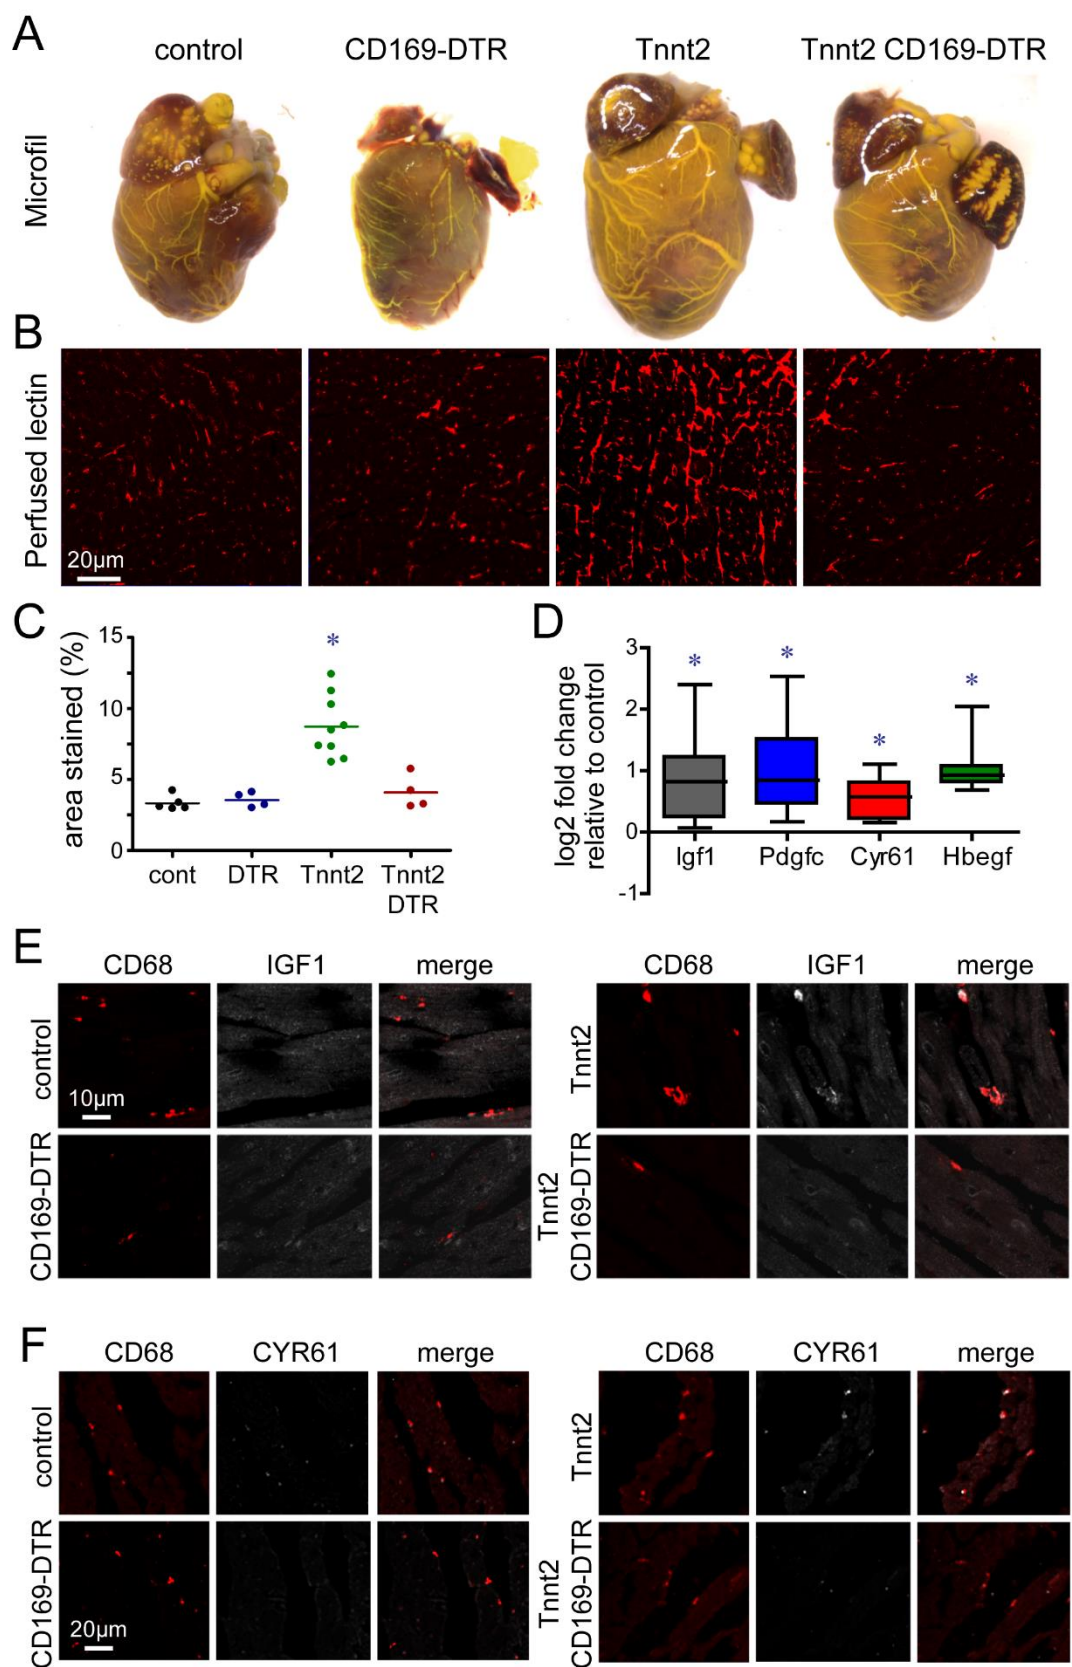

**Figure 5. CCR2- macrophages are essential for coronary angiogenesis in dilated cardiomyopathy.** **A**, Microfil vascular casting of control, CD169-DTR,  $Tnnt2^{\Delta K210/\Delta K210}$ , and  $Tnnt2^{\Delta K210/\Delta K210}$  CD169-DTR hearts after 3 weeks of DT treatment.  $Tnnt2^{\Delta K210/\Delta K210}$  hearts display marked expansion in the coronary macrovasculature that is diminished in  $Tnnt2^{\Delta K210/\Delta K210}$  CD169-DTR hearts. n=4 per experimental group. **B**, Microvascular imaging (perfused lectin) of control, CD169-DTR,  $Tnnt2^{\Delta K210/\Delta K210}$ , and  $Tnnt2^{\Delta K210/\Delta K210}$  CD169-DTR hearts after 3 weeks of DT treatment.  $Tnnt2^{\Delta K210/\Delta K210}$  hearts display marked expansion in the coronary microvasculature that is diminished in  $Tnnt2^{\Delta K210/\Delta K210}$  CD169-DTR hearts. n=4-9 per experimental group. **C**, Quantification of the coronary microvascular in control, CD169-DTR,  $Tnnt2^{\Delta K210/\Delta K210}$ , and  $Tnnt2^{\Delta K210/\Delta K210}$  CD169-DTR hearts. Each data point represents an individual animal. \* denotes  $p < 0.05$  (ANOVA, Post-hoc Tukey) compared to controls. **D**, CCR2- macrophages from  $Tnnt2^{\Delta K210/\Delta K210}$  hearts display increased *Igf1*, *Pdgfc*, *Cyr61*, and *Hbegf* mRNA expression compared to CCR2- macrophages isolated from control mice. n=5 per experimental group. \* denotes  $p < 0.05$  (Mann-Whitney test) compared to controls. **E-F**, Immunostaining of control, CD169-DTR,  $Tnnt2^{\Delta K210/\Delta K210}$ , and  $Tnnt2^{\Delta K210/\Delta K210}$  CD169-DTR hearts after 3 weeks of DT treatment showing that macrophages within the LV myocardium of  $Tnnt2^{\Delta K210/\Delta K210}$  mice display increased expression of IGF1 (E, white) and CYR61 (F, white). Red: CD68. n=5 per experimental group.

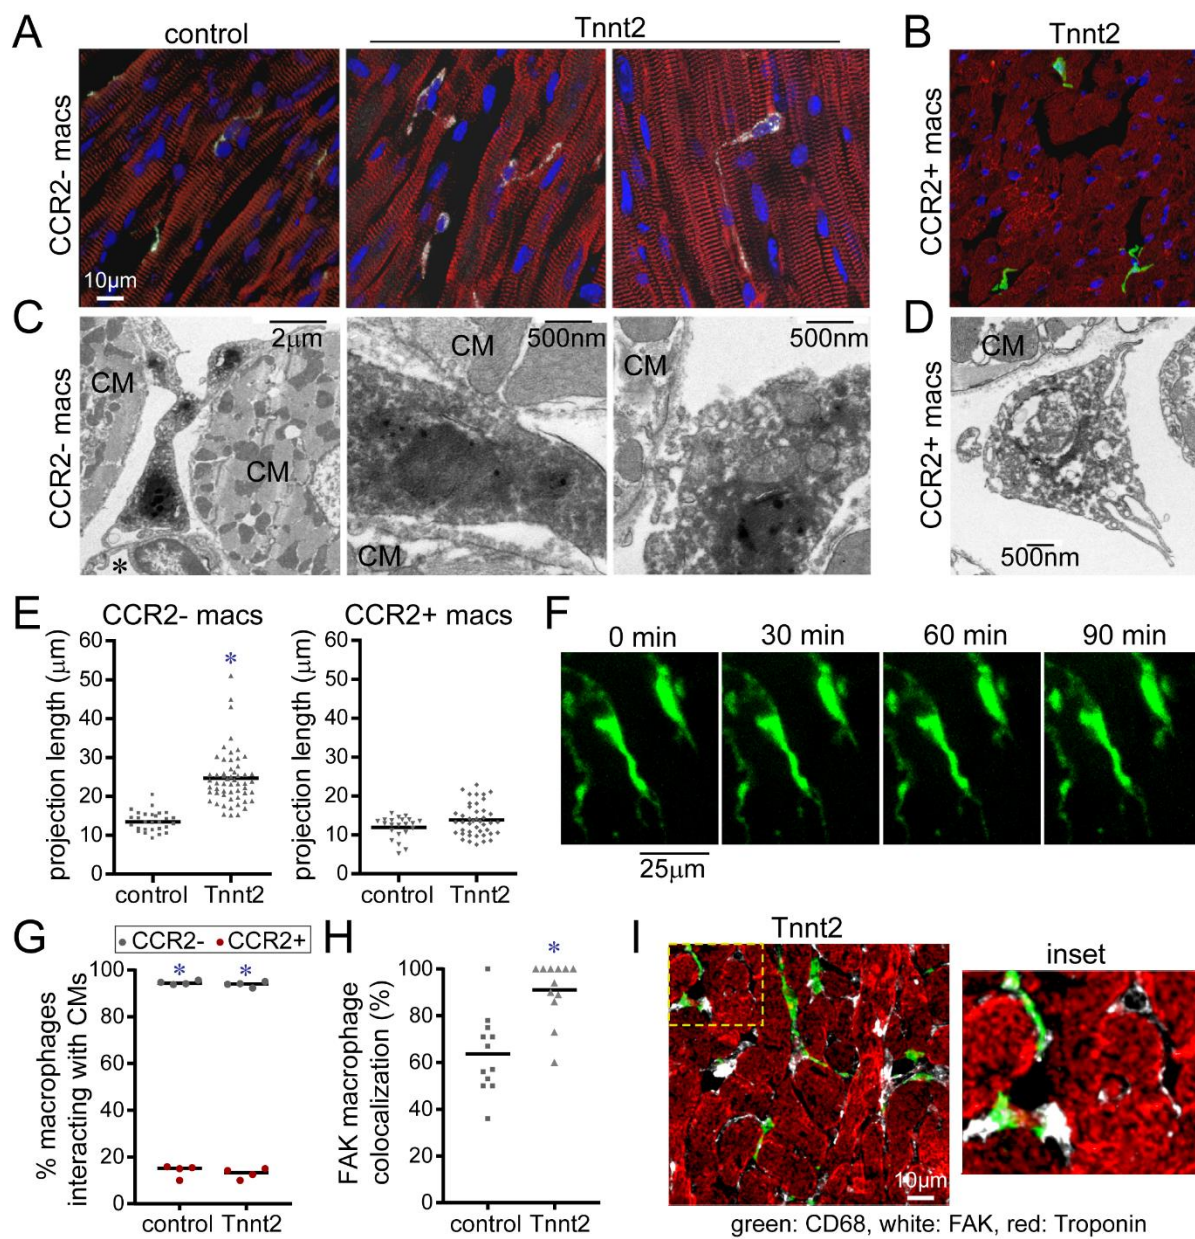

**Figure 6. CCR2- macrophages interact with neighboring cardiomyocytes through focal adhesion complexes.** **A-B**, Compressed Z-stack images showing distinct morphologies of CCR2- (A) and CCR2+ (B) cardiac macrophages in the LV myocardium of a 8-week-old control CCR2<sup>GFP/+</sup> and Tnnt2<sup>ΔK210/ΔK210</sup> CCR2<sup>GFP/+</sup> hearts. CCR2- cardiac macrophage projections are closely associated with neighboring cardiomyocytes whereas CCR2+ macrophage projections are shorter and remain localized to the interstitial space. n=4-6 per experimental group. CD68: white, GFP: green,  $\alpha$ -actinin, red, DAPI: blue. **C-D**, Electron microscopy of CCR2- (C) and CCR2+ (D) cardiac macrophages in Tnnt2<sup>ΔK210/ΔK210</sup> CCR2<sup>GFP/+</sup> hearts. CCR2- macrophage are found adjacent to endothelial cells (\*) and make contact with cardiomyocytes (CM). CCR2+ macrophages remain within the interstitial space between cardiomyocytes. n=4 per experimental group. **E**, Measurement of projection length in CCR2- and CCR2+ macrophages found within the myocardium of 8-week-old control CCR2<sup>GFP/+</sup> and Tnnt2<sup>ΔK210/ΔK210</sup> CCR2<sup>GFP/+</sup> hearts. \* denotes p<0.05 (Mann-Whitney test) compared to controls. **F**, 2-photon microscopy of live CX3CR1<sup>GFP/+</sup> CCR2<sup>RFP/+</sup> papillary muscle cell preparations (n=4) showing that projections emanating from CCR2- macrophages (green) remain stable over 90 minutes. **G**, Quantification of the percent of CCR2- (black data points) and CCR2+ (red data points) macrophages interacting with cardiomyocytes in control and Tnnt2<sup>ΔK210/ΔK210</sup> hearts. Each data point represents an individual animal (n=4). \* denotes p<0.05 (Mann-Whitney test) comparing CCR2- to CCR2+ macrophages. **H-I**, Immunostaining for CD68 (green), FAK (white), and troponin (red) reveals evidence of focal adhesion complexes at sites of macrophage-cardiomyocyte interaction. Each data point represents an individual animal (n=12 per experimental group). \* denotes p<0.05 (Mann-Whitney test) compared to controls.

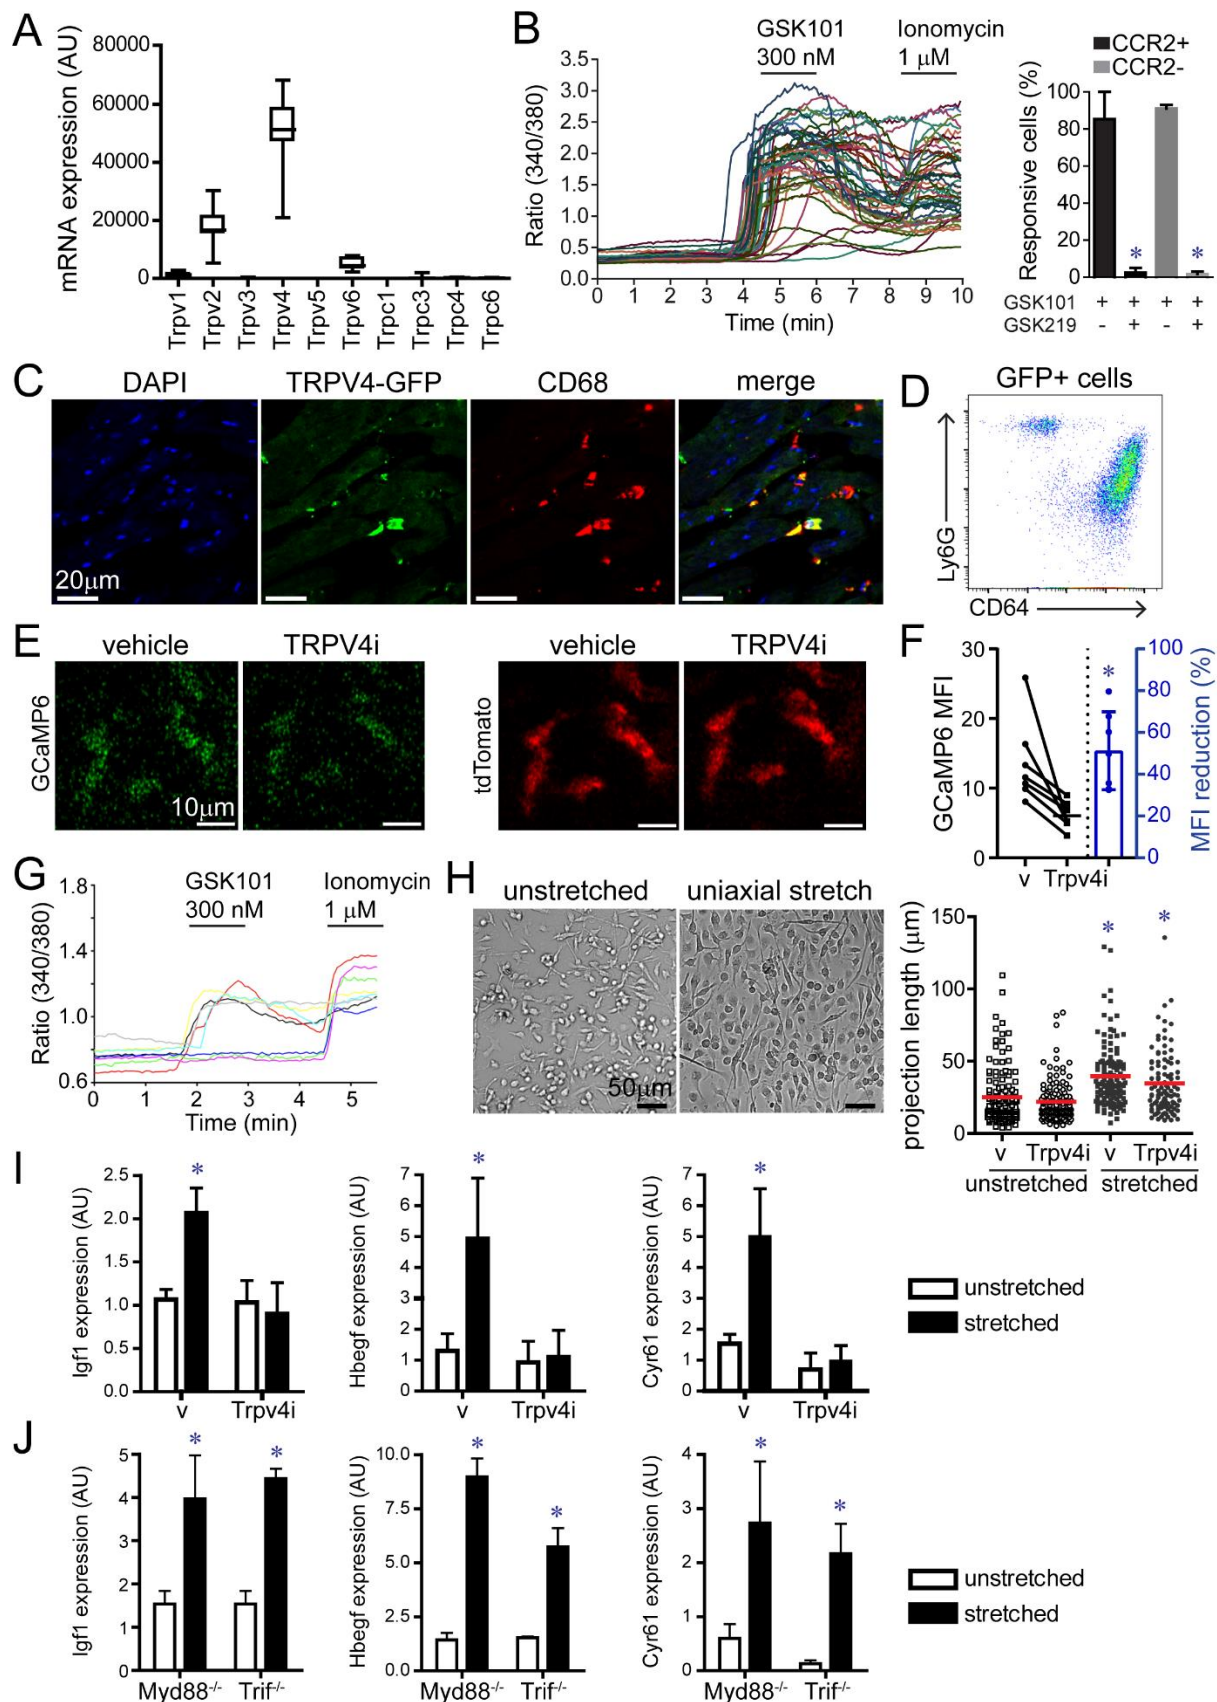

**Figure 7. The mechanoresponsive TRPV4 channel regulates growth factor expression in macrophages.** **A**, mRNA expression of TRP channels in CCR2- macrophages showing robust expression of *Trpv4*. Data generated from n=20 samples. **B**, Ratiometric calcium assay demonstrating that cardiac macrophages have active TRPV4 channels. GSK101: TRPV4 agonist, GSK219: TRPV4 antagonist. \* denotes p<0.05 comparing GSK101 treated cells with GSK101 and GSK219 treated cells. **C**, Immunostaining of TRPV4-GFP BAC transgenic mice showing GFP (green) expression in CD68+ macrophages (red) within the LV myocardium. **D**, Flow cytometry of cardiac CD45+GFP+ leukocytes isolated from TRPV4-GFP heart revealing that macrophages and neutrophils express TRPV4. Repetitive images from n=4 mice. **E**, 2-photon imaging of GFP (green) and tdTomato (red) in papillary muscle preparations harvested from CX3CR1-ertCre; Rosa26-GCaMP6/tdTomato mice treated with either vehicle or the TRPV4 inhibitor GSK219 (TRPV4i). **F**, Quantification of GCaMP6 signal. Each data point represent mean data from an individual experiment (n=6). \* denotes p<0.05 compared to vehicle. **G**, Ratiometric calcium assay showing that bone marrow derived macrophages express active TRPV4 channels. GSK101: TRPV4 agonist, Ionomycin: calcium ionophore. **H**, Cyclic uniaxial stretch (1 Hz, 10% deformation, 24 hours) promotes elongation of bone marrow derived macrophages independent of TRPV4 channel activity. n=4 independent experiments. **I**, Quantitative RT-PCR assays demonstrating that cyclic uniaxial stretch promotes increased *Igf1*, *Hbegf*, and *Cyr61* mRNA expression in bone marrow-derived macrophages. Upregulation of *Igf1*, *Hbegf*, and *Cyr61* mRNA expression by uniaxial cyclic stretch is dependent on TRPV4 channel activity. n=4 independent experiments. **J**, Quantitative RT-PCR assays demonstrating that *Igf1*, *Hbegf*, and *Cyr61* mRNA expression by uniaxial cyclic stretch is independent of MYD88 and TRIF signaling pathways. n=4 independent experiments. \* denotes p<0.05 compared to vehicle treated unstretched cells (ANOVA post-hoc Tukey) (F-H). Error bars denote standard deviation (G-H).



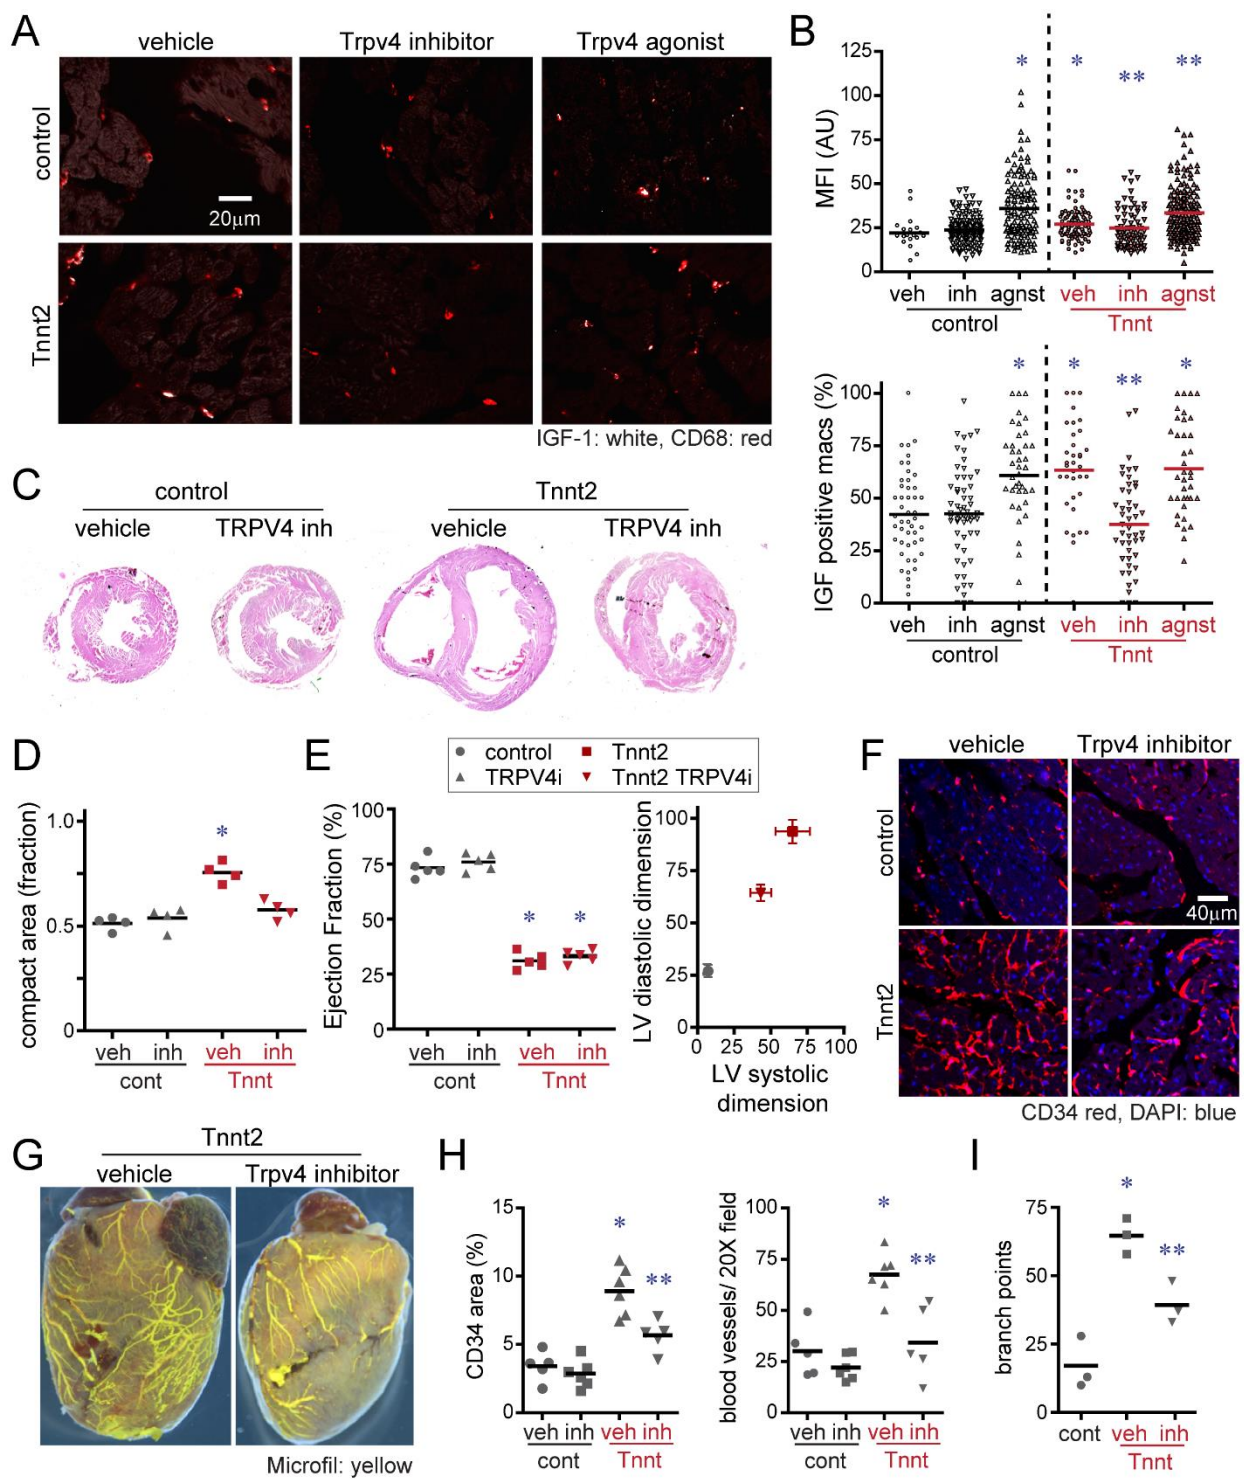

**Figure 8. TRPV4 channel activity regulates IGF1 expression in CCR2- macrophages and is required for coronary angiogenesis.** **A**, Immunostaining for IGF1 (white) and CD68 (red) in the LV myocardium of control and  $Tnnt2^{\Delta K210/\Delta K210}$  mice treated with either vehicle, TRPV4 inhibitor, or TRPV4 agonist demonstrating that TRPV4 channel activity regulates macrophage IGF1 protein expression *in vivo*. **B**, Quantification of IGF1 protein expression (% IGF1+ macrophages, IGF1 MFI) in control and  $Tnnt2^{\Delta K210/\Delta K210}$  hearts treated with either vehicle, TRPV4 inhibitor, or TRPV4 agonist. MFI: mean florescent intensity. Each data point represents an analyzed 20X field. n=5 animals per experimental group (A-B). \* denotes  $p < 0.05$  compared to vehicle treated control hearts. \*\* denotes  $p < 0.05$  compared to vehicle treated  $Tnnt2^{\Delta K210/\Delta K210}$  hearts. (ANOVA, post-hoc Tukey). **C**, Low magnification H&E images of control and  $Tnnt2^{\Delta K210/\Delta K210}$  mice treated with either vehicle or TRPV4 inhibitor for 2 weeks beginning at 6 weeks of age. LV in cross-section (n=4 per experimental group). **D**, Quantification of the ratio of compact to trabecular myocardium in control and  $Tnnt2^{\Delta K210/\Delta K210}$  mice treated with either vehicle or TRPV4 inhibitor. Each data point represents an individual animal. \* denotes  $p < 0.05$  compared to vehicle treated control hearts (ANOVA, post-hoc Tukey). **E**, Echocardiographic assessment of LV ejection fraction and LV chamber dimensions in control and  $Tnnt2^{\Delta K210/\Delta K210}$  mice treated with either vehicle or TRPV4 inhibitor for 2 weeks beginning at 6 weeks of age. n=5 per experimental group. \* denotes  $p < 0.05$  compared to vehicle treated control hearts (ANOVA, post-hoc Tukey). **F**, Immunostaining for CD34 (red) in the LV myocardium of control and  $Tnnt2^{\Delta K210/\Delta K210}$  mice treated with either vehicle or TRPV4 inhibitor showing that TRPV4 channel activity contributes to coronary microvascular expansion in  $Tnnt2^{\Delta K210/\Delta K210}$  hearts. **G**, Microfil vascular casting showing that TRPV4 channel activity is necessary for expansion of coronary microvasculature in  $Tnnt2^{\Delta K210/\Delta K210}$  hearts. **H-I**, Quantification of coronary microvasculature (G) and coronary microvasculature (H) in the designated experimental groups. Each data point represents an individual animal (n=5 per experimental group). \* denotes  $p < 0.05$  compared to vehicle treated control. \*\* denotes  $p < 0.05$  compared to all other groups (ANOVA, post-hoc Tukey).
